# Supplementary material for: Unrelated Fungal Rust Candidate Effectors Act on Overlapping Plant Functions
Source: MDPI journal article supplement (doi:10.3390/microorganisms9050996), 2021-05-05
Supplement: s1 [file s1]

**Supplementary Table S2.** Percentage of identity and similarity, presented as “ID (SIM)”, calculated with pairwise sequence alignment of CEs using Needle.

[illegible]
