# Supplementary material for: Unrelated Fungal Rust Candidate Effectors Act on Overlapping Plant Functions
Source: MDPI journal article supplement (doi:10.3390/microorganisms9050996), 2021-05-05
Supplement: s1 [file s1]

**Supplementary Table S3.** Summary of metabolomic analysis in negative mode of the data of extractions with 20% and 80% methanol combined. Assigned, CHO, CHON and Mean mass refer exclusively to the sample in question, while the amount of deregulated formulas considers those identified in the sample or in the Control.

| Sample     | Assigned | CHO  | CHON | Mean mass | Highly unsaturated and phenolic | Aliphatic | Peptides | Polyphenolic | Condensed aromatics | Sugars | Identified | De-regulated (%) | Up-regulated (%) | Down-regulated (%) |
|------------|----------|------|------|-----------|---------------------------------|-----------|----------|--------------|---------------------|--------|------------|------------------|------------------|--------------------|
| Mlp37347   | 2954     | 1800 | 1154 | 451.517   | 1509                            | 822       | 402      | 127          | 47                  | 47     | 3576       | 101 (2.82)       | 58 (1.62)        | 43 (1.20)          |
| Mlp72983   | 3056     | 2171 | 885  | 461.914   | 1655                            | 887       | 285      | 125          | 40                  | 64     | 3575       | 100 (2.80)       | 22 (0.62)        | 78 (2.18)          |
| Mlp102036  | 3045     | 1893 | 1152 | 442.952   | 1539                            | 802       | 448      | 145          | 64                  | 47     | 3719       | 278 (7.48)       | 164 (4.41)       | 114 (3.07)         |
| Mlp106078  | 2796     | 1691 | 1105 | 445.203   | 1454                            | 769       | 351      | 128          | 54                  | 40     | 3522       | 119 (3.38)       | 46 (1.31)        | 73 (2.07)          |
| Mlp123218* | 2695     | 1710 | 985  | 431.274   | 1398                            | 715       | 379      | 118          | 53                  | 32     | 3515       | 139 (3.95)       | 97 (2.76)        | 42 (1.19)          |
| Mlp123227  | 2679     | 1663 | 1016 | 439.461   | 1320                            | 754       | 378      | 122          | 59                  | 46     | 3645       | 353 (9.68)       | 172 (4.72)       | 181 (4.97)         |
| Mlp123531  | 3073     | 1946 | 1127 | 450.879   | 1610                            | 815       | 422      | 125          | 57                  | 44     | 3599       | 113 (3.14)       | 70 (1.94)        | 43 (1.19)          |
| Mlp124256  | 2815     | 1887 | 928  | 453.082   | 1495                            | 829       | 248      | 134          | 57                  | 52     | 3470       | 77 (2.22)        | 25 (0.72)        | 52 (1.50)          |
| Mlp124266  | 2754     | 1679 | 1075 | 435.403   | 1340                            | 798       | 395      | 122          | 58                  | 41     | 3595       | 244 (6.79)       | 90 (2.50)        | 154 (4.28)         |
| Mlp124357  | 3151     | 1983 | 1168 | 448.153   | 1599                            | 892       | 428      | 131          | 53                  | 48     | 3689       | 148 (4.01)       | 64 (1.73)        | 84 (2.28)          |
| Mlp124466  | 3026     | 1969 | 1057 | 450.488   | 1587                            | 863       | 361      | 122          | 50                  | 43     | 3530       | 69 (1.95)        | 24 (0.68)        | 45 (1.27)          |
| Mlp124497  | 2937     | 1801 | 1136 | 449.426   | 1464                            | 844       | 418      | 122          | 52                  | 37     | 3601       | 171 (4.75)       | 82 (2.28)        | 89 (2.47)          |
| Mlp124499  | 2946     | 1878 | 1068 | 443.459   | 1493                            | 827       | 375      | 150          | 63                  | 38     | 3613       | 217 (6.01)       | 118 (3.27)       | 99 (2.74)          |
| Mlp124518  | 2735     | 1651 | 1084 | 437.807   | 1345                            | 767       | 400      | 122          | 61                  | 40     | 3547       | 237 (6.68)       | 117 (3.30)       | 120 (3.38)         |
| Control    | 3113     | 2097 | 1016 | 458.505   | 1712                            | 835       | 309      | 143          | 56                  | 58     | 3113       | -                | -                | -                  |

\* For the transgenic line Mlp123218, only the extraction with 20% methanol was analysed, thus the sample was compared to the Control extraction with 20% methanol.
