# Supplementary material for: Unrelated Fungal Rust Candidate Effectors Act on Overlapping Plant Functions
Source: MDPI journal article supplement (doi:10.3390/microorganisms9050996), 2021-05-05
Supplement: s1 [file s1]

**Supplementary Table S5.** Parameters used for bioinformatic analyses.

| Analysis step                            | Software    |                   | Parameters                                                                                                                                                                                                                 |
|------------------------------------------|-------------|-------------------|----------------------------------------------------------------------------------------------------------------------------------------------------------------------------------------------------------------------------|
| Read trimming and filtering              | Trimmomatic |                   | \-phred 33 LEADING:3 TRAILING:3 SLIDINGWINDOW:4:15 MINLEN:25                                                                                                                                                               |
| Read alignment                           | HISAT2      |                   | default parameters and mate inner distance according to the replicate                                                                                                                                                      |
| Read count                               | R 4.0.0     | GenomicFeatures   | makeTxDbFromBiomart(biomart = "plants_mart", dataset = "athaliana_eg_gene", id_prefix = "ensembl_", host = "plants.ensembl.org", taxonomyId = 3702) %>% transcriptsBy("gene")                                              |
|                                          |             | GenomicAlignments | summarizeOverlaps with mode = Union, singleEnd = F, ignore.strand = FALSE, fragments = T                                                                                                                                   |
| Filtering out weakly expressed genes     |             | CustomSeletion    | mean(TPM) < mean(DAFS cutoff)                                                                                                                                                                                              |
| Variation between replicates and samples |             | DESeq2            | plotPCA with ntop = All Arabidopsis genes expressed in samples<br>estimateSizeFactors with controlGenes; DESeq(betaPrior = T),  log2(Fold change)  ≥ 2 and adjusted pValue ≤ 0.01                                          |
| Differential expression analysis         |             | clusterProfiler   | enrichGO with universe = All Arabidopsis genes expressed in samples, OrgDb = org.At.tair.db, ont = "BP", keyType = "TAIR", pAdjustMethod = "BH", pvalueCutoff = 0.01, qvalueCutoff = 0.05. readable = TRUE) %>% simplify() |
| GO enrichment                            |             | KEGGprofile       | find_enriched_pathway with species = "ath" and download_latest = TRUE                                                                                                                                                      |
| KEGG enrichment                          |             | WGCNA             | blockwiseModules with log2-transformed TPM values of deregulated genes, power = 14, TOMType = "unsigned", minModuleSize = 30, reassignThreshold = 0, mergeCutHeight = 0.3, numericLabels = TRUE, pamRespectsDendro = FALSE |
| Co-expression network analysis           |             |                   |                                                                                                                                                                                                                            |
