# Supplementary material for: Unrelated Fungal Rust Candidate Effectors Act on Overlapping Plant Functions
Source: MDPI journal article supplement (doi:10.3390/microorganisms9050996), 2021-05-05
Supplement: s1 [file s1]

[illegible]







|           |         |        |         |        |         |        |         |         |         |         |         |         |         |         |         |         |         |         |         |         |         |         |         |         |         |         |         |        |
|-----------|---------|--------|---------|--------|---------|--------|---------|---------|---------|---------|---------|---------|---------|---------|---------|---------|---------|---------|---------|---------|---------|---------|---------|---------|---------|---------|---------|--------|
| AT1979880 | 1.2614  | 0.0020 | 1.6708  | 0.0019 | 1.6210  | 0.0055 | 1.4957  | 0.0258  | 1.5220  | 0.0090  | 2.0900  | 0.0002  | 1.2733  | 0.0149  | 1.8153  | 0.0103  | 2.3138  | 0.0000  | 2.4464  | 0.0001  | -0.3860 | 0.6782  | 1.6266  | 0.0021  | 1.3600  | 0.0000  | 2.2349  | 0.0000 |
| AT1979881 | -2.0772 | 0.0093 | -2.5892 | 0.0000 | -1.0391 | 0.1731 | -0.3147 | 0.7933  | -1.4008 | 0.3989  | -0.5418 | 0.4887  | -2.2609 | 0.0000  | -2.3882 | 0.0003  | -1.6888 | 0.0045  | -1.4789 | 0.0889  | -1.8231 | 0.0656  | -2.3399 | 0.0000  | -1.4768 | 0.0048  | -0.8050 | 0.0267 |
| AT1979770 | -0.5202 | 0.0000 | -0.5202 | 0.0000 | -1.2570 | 0.0000 | -1.2570 | 0.0000  | -0.4602 | 0.0000  | -0.4602 | 0.0000  | -0.4602 | 0.0000  | -0.4602 | 0.0000  | -0.4602 | 0.0000  | -0.4602 | 0.0000  | -0.4602 | 0.0000  | -0.4602 | 0.0000  | -0.4602 | 0.0000  | -0.4602 | 0.0000 |
| AT1980130 | -2.1970 | 0.0020 | -1.4600 | 0.0745 | -0.7276 | 0.0557 | -1.6454 | 0.0988  | -0.9881 | 0.0869  | -1.9556 | 0.0600  | -2.0208 | 0.0043  | -0.2121 | 0.9963  | -2.3178 | 0.0000  | -0.6238 | 0.8959  | -0.0709 | 0.9356  | -1.0789 | 0.0128  | -0.6471 | 0.0606  | -1.0301 | 0.1687 |
| AT1981040 | -0.5544 | 0.5043 | -1.1730 | 0.1779 | -0.6774 | 0.4549 | -0.8187 | 0.3823  | -0.7332 | 0.8059  | -1.3785 | 0.1308  | -0.6424 | 0.4469  | -0.8779 | 0.4959  | -2.0599 | 0.0006  | -1.9006 | 0.0342  | -1.6390 | 0.5981  | -0.1187 | 0.9199  | -0.0477 | 0.9853  | -1.7723 | 0.0132 |
| AT1980190 | -0.9477 | 0.0358 | -1.7350 | 0.0000 | -2.2154 | 0.0000 | -0.9370 | 0.0784  | -1.5882 | 0.0002  | -0.9041 | 0.0579  | -1.6537 | 0.0000  | -0.3189 | 0.8755  | -0.7008 | 0.1231  | -0.0400 | 0.9983  | -1.1639 | 0.0177  | -0.8938 | 0.0449  | -0.0712 | 0.9474  | -0.4949 | 0.2903 |
| AT1980240 | -1.0757 | 0.0102 | -1.0641 | 0.1708 | -0.5641 | 0.1708 | -0.5641 | 0.1708  | -0.5641 | 0.1708  | -0.5641 | 0.1708  | -0.5641 | 0.1708  | -0.5641 | 0.1708  | -0.5641 | 0.1708  | -0.5641 | 0.1708  | -0.5641 | 0.1708  | -0.5641 | 0.1708  | -0.5641 | 0.1708  | -0.5641 | 0.1708 |
| AT1980555 | -0.8279 | 0.1850 | -2.7118 | 0.0000 | -2.6769 | 0.0000 | -0.2903 | 0.7703  | -2.9517 | 0.0000  | -0.7076 | 0.3339  | -2.7149 | 0.0000  | -0.4857 | 0.0764  | -1.5513 | 0.0000  | -0.9187 | 0.5086  | -0.0049 | 0.9431  | -0.0741 | 0.3036  | -0.8428 | 0.3405  | -0.3883 | 0.3392 |
| AT1980740 | -1.1631 | 0.0235 | -1.4229 | 0.0063 | -1.7331 | 0.0011 | -0.2316 | 0.2508  | -0.2022 | 0.2352  | -2.2495 | 0.0000  | -1.3984 | 0.0039  | -1.1915 | 0.0476  | -1.4456 | 0.0049  | -0.9882 | 0.2052  | 0.0171  | 0.9915  | -1.2654 | 0.0122  | -0.9626 | 0.4735  | -0.7096 | 0.1538 |
| AT1980820 | -1.0841 | 0.0827 | -1.0841 | 0.0827 | -1.0841 | 0.0827 | -1.0841 | 0.0827  | -1.0841 | 0.0827  | -1.0841 | 0.0827  | -1.0841 | 0.0827  | -1.0841 | 0.0827  | -1.0841 | 0.0827  | -1.0841 | 0.0827  | -1.0841 | 0.0827  | -1.0841 | 0.0827  | -1.0841 | 0.0827  | -1.0841 | 0.0827 |
| AT1980840 | -2.0170 | 0.0000 | -2.0170 | 0.0000 | -2.0170 | 0.0000 | -2.0170 | 0.0000  | -2.0170 | 0.0000  | -2.0170 | 0.0000  | -2.0170 | 0.0000  | -2.0170 | 0.0000  | -2.0170 | 0.0000  | -2.0170 | 0.0000  | -2.0170 | 0.0000  | -2.0170 | 0.0000  | -2.0170 | 0.0000  | -2.0170 | 0.0000 |
| AT1980870 | -0.6934 | 0.0300 | -0.6934 | 0.0300 | -0.6934 | 0.0300 | -0.6934 | 0.0300  | -0.6934 | 0.0300  | -0.6934 | 0.0300  | -0.6934 | 0.0300  | -0.6934 | 0.0300  | -0.6934 | 0.0300  | -0.6934 | 0.0300  | -0.6934 | 0.0300  | -0.6934 | 0.0300  | -0.6934 | 0.0300  | -0.6934 | 0.0300 |
| AT1980920 | -1.0120 | 0.1202 | -0.8742 | 0.5562 | -0.3157 | 0.7538 | -0.1052 | 0.9383  | -0.4026 | 0.9836  | -0.9411 | 0.1906  | -1.3234 | 0.0287  | -0.0160 | 0.9498  | -0.6332 | 0.3638  | -0.1428 | 0.8810  | -2.5781 | 0.0000  | -1.1520 | 0.0764  | -0.3087 | 0.8186  | -0.4501 | 0.4816 |
| AT1980980 | -0.2542 | 0.4515 | -1.7941 | 0.0000 | -1.7941 | 0.0000 | -1.7941 | 0.0000  | -1.7941 | 0.0000  | -1.7941 | 0.0000  | -1.7941 | 0.0000  | -1.7941 | 0.0000  | -1.7941 | 0.0000  | -1.7941 | 0.0000  | -1.7941 | 0.0000  | -1.7941 | 0.0000  | -1.7941 | 0.0000  | -1.7941 | 0.0000 |
| AT1981070 | -0.8490 | 0.2140 | -0.3799 | 0.0000 | -0.8490 | 0.2140 | -0.3799 | 0.0000  | -0.8490 | 0.2140  | -0.3799 | 0.0000  | -0.8490 | 0.2140  | -0.3799 | 0.0000  | -0.8490 | 0.2140  | -0.3799 | 0.0000  | -0.8490 | 0.2140  | -0.3799 | 0.0000  | -0.8490 | 0.2140  | -0.3799 | 0.0000 |
| AT1980890 | -0.1890 | 0.3926 | -3.2669 | 0.0000 | -3.2669 | 0.0000 | -0.4892 | 0.5559  | -1.8490 | 0.0000  | -0.2996 | 0.6636  | -4.0052 | 0.0000  | -0.1461 | 0.9538  | -4.8802 | 0.4720  | -0.1702 | 0.9565  | -0.3449 | 0.9882  | -0.1890 | 0.7969  | -0.0939 | 0.9437  | -0.3390 | 0.2191 |
| AT1981020 | -0.8480 | 0.2835 | -1.3614 | 0.0633 | -0.8107 | 0.4010 | -0.0959 | 0.9484  | -1.3650 | 0.1232  | 0.8736  | 0.0634  | -0.5487 | 0.1798  | -1.9587 | 0.0427  | -0.8288 | 0.0875  | -0.4227 | -0.8479 | 0.8658  | -0.0749 | 0.5969  | -2.2109 | 0.0031  | -0.5963 | 0.0408  |        |
| AT1980520 | 3.0615  | 0.0000 | 1.9159  | 0.0999 | 0.7959  | 0.0456 | 0.0456  | 0.7959  | 1.2274  | 0.0748  | 2.5255  | 0.0000  | 1.2456  | 0.0000  | 2.2685  | 0.0000  | 2.6808  | 0.0776  | 3.4909  | 0.0000  | 2.7265  | 0.0011  | 2.2483  | 0.0004  | 2.5688  | 0.0000  | 1.5999  | 0.0038 |
| AT1980530 | -0.2602 | 0.4733 | -2.0625 | 0.0700 | -3.5541 | 0.1534 | -0.9339 | 0.6675  | -0.8867 | 0.4433  | -1.0952 | 0.1202  | -0.5879 | 0.4888  | -1.5351 | 0.1003  | -1.6975 | 0.0275  | -2.2403 | 0.0075  | -0.6209 | 0.6310  | -0.3887 | 0.7014  | -1.3635 | -0.1453 | -1.5753 | 0.0271 |
| AT1980930 | -2.0288 | 0.0001 | -1.3870 | 0.0236 | -1.0324 | 0.1602 | -0.9120 | 0.2602  | -0.9374 | 0.2291  | -0.2487 | 0.7503  | -2.6997 | 0.0000  | -1.0053 | 0.2020  | -0.6892 | 0.2807  | -0.4037 | 0.7343  | -1.5321 | 0.0275  | -2.2901 | 0.0000  | -1.3608 | 0.0312  | -1.3090 | 0.0052 |
| AT1980290 | -0.7243 | 0.0000 | -1.0099 | 0.1886 | -1.4622 | 0.0628 | -0.7554 | 0.4560  | -1.5153 | 0.0512  | -1.5667 | 0.0334  | -3.2505 | 0.0000  | -1.9521 | 0.0009  | -1.5665 | 0.0218  | -0.7066 | 0.5437  | -2.6798 | 0.0001  | -2.4588 | 0.0001  | -1.1141 | 0.1963  | -0.7866 | 0.2279 |
| AT1980350 | -2.2298 | 0.0034 | -1.9972 | 0.0455 | -1.4092 | 0.1063 | -0.2378 | 0.8623  | -1.0649 | 0.2830  | -1.0176 | 0.2183  | -1.4675 | 0.0026  | -1.4409 | 0.2596  | -1.7232 | 0.0480  | -0.7012 | 0.9439  | -0.8366 | 0.4564  | -1.3314 | 0.0270  | -1.6790 | 0.0373  | -1.1846 | 0.0828 |
| AT1980370 | -0.5368 | 0.2097 | -0.5176 | 0.0001 | -0.5629 | 0.4889 | -1.1374 | 0.1196  | -0.4949 | 0.9784  | -1.3267 | 0.0120  | -1.0731 | 0.0518  | -0.6987 | 0.4476  | -2.2396 | 0.0000  | -0.8932 | 0.2091  | -0.0846 | 0.9565  | -0.0233 | 1.1757  | 0.0135  | -0.7352 | -0.0803 | 0.0411 |
| AT1980380 | -1.3801 | 0.0736 | -1.9321 | 0.4321 | -0.5339 | 0.7689 | -1.9134 | 0.2333  | -1.2386 | 0.1898  | -0.8189 | 0.0000  | -1.8020 | 0.0000  | -0.7041 | 0.9949  | -1.0862 | 0.1546  | -1.2554 | 0.2047  | -1.7614 | 0.0355  | -2.2094 | 0.0011  | -1.0847 | 0.2727  | -0.0418 | 0.9257 |
| AT1980430 | -0.4521 | 0.4317 | -0.2637 | 0.7036 | -0.7795 | 0.2116 | -0.0618 | 0.9157  | -0.4996 | 0.4546  | -0.9056 | 0.1100  | -0.5451 | 0.3088  | -0.0163 | 0.9940  | -0.8665 | 0.1010  | -0.4322 | 0.9069  | -0.0052 | 1.0000  | -0.5694 | 0.1176  | -0.8069 | 0.2209  | -2.2752 | 0.0000 |
| AT1980490 | -0.4316 | 0.4501 | -1.3621 | 0.0509 | -0.8120 | 0.6100 | -0.4706 | 0.4162  | 0.8889  | -1.3895 | 0.0100  | -0.3413 | 0.4948  | -0.9385 | 0.1420  | -1.9331 | 0.0001  | -2.0161 | 0.1114  | -0.0253 | 0.9917  | -0.5171 | 0.3684  | -2.5609 | 0.0000  | -2.7550 | 0.0000  |        |
| AT1980450 | -0.2444 | 0.7953 | -0.4698 | 0.4508 | -0.8637 | 0.1767 | -2.4153 | 0.0027  | -0.5555 | 0.8811  | -1.3375 | 0.0595  | -0.2580 | 0.7718  | -0.6515 | 0.6474  | -0.9566 | 0.4438  | -0.4074 | 0.7343  | -0.6507 | 0.5349  | -0.4189 | 0.6439  | -1.4339 | 0.0853  | -0.7203 | 0.0011 |
| AT1980470 | -0.9231 | 0.2628 | -1.7629 | 0.0236 | -1.5414 | 0.0919 | -1.2349 | 0.0099  | -1.5144 | 0.7240  | -1.6624 | 0.0478  | -0.7185 | 0.3880  | -2.2347 | 0.0444  | -2.0159 | 0.0009  | -0.9503 | 0.6487  | -0.6394 | 0.5981  | -1.2280 | 0.1284  | -0.8631 | -1.1509 | -0.6830 | 0.1681 |
| AT1980410 | -1.2110 | 0.0000 | -2.7958 | 0.0000 | -2.3242 | 0.0000 | -2.4231 | 0.0000  | -0.4817 | 0.5788  | -2.6822 | 0.0000  | -2.3181 | 0.0000  | -2.6755 | 0.0000  | -3.1541 | 0.0000  | -2.3395 | 0.0000  | -1.8146 | 0.0007  | -1.4853 | 0.0000  | -0.4232 | 0.0000  | -2.6976 | 0.0000 |
| AT1980480 | -1.8514 | 0.0000 | -1.8514 | 0.0000 | -1.8514 | 0.0000 | -1.8514 | 0.0000  | -1.8514 | 0.0000  | -1.8514 | 0.0000  | -1.8514 | 0.0000  | -1.8514 | 0.0000  | -1.8514 | 0.0000  | -1.8514 | 0.0000  | -1.8514 | 0.0000  | -1.8514 | 0.0000  | -1.8514 | 0.0000  | -1.8514 | 0.0000 |
| AT1980490 | -1.1458 | 0.0145 | -0.3545 | 0.0047 | -1.3524 | 0.0039 | -1.1740 | 0.0486  | -0.9983 | 0.0602  | -1.6429 | 0.0013  | -0.2136 | 0.0815  | -1.1807 | 0.0282  | -0.5050 | 0.0000  | -1.2002 | 0.0954  | -0.3238 | 0.7981  | -0.0895 | 0.0675  | -4.1500 | -0.0047 | -0.3667 | 0.0000 |
| AT1980475 | -0.4732 | 0.4781 | -1.8714 | 0.0002 | -1.0393 | 0.0003 | -1.3970 | 0.0548  | -0.7882 | 0.3555  | -1.3478 | 0.0336  | -1.0206 | 0.0711  | -1.0900 | 0.1398  | -1.5559 | 0.0007  | -0.1862 | 0.9884  | -0.0887 | 0.9460  | -0.3932 | 0.5822  | -2.1947 | 0.0001  | -1.9572 | 0.0003 |
| AT1980520 | -0.0285 | 0.9802 | -0.0732 | 0.9537 | -0.1701 | 0.9837 | -0.1525 | 0.9184  | -3.1506 | 0.0000  | -0.3509 | 0.6959  | -0.4417 | 0.6220  | -0.4047 | 0.8344  | -0.3512 | 0.7116  | -0.4480 | 0.9504  | -0.0285 | 0.4631  | -0.0323 | 0.9810  | -1.3719 | 0.0423  | -1.0294 | 0.9001 |
| AT1980540 | -1.8545 | 0.0000 | -1.8545 | 0.0000 | -1.8545 | 0.0000 | -1.8545 | 0.0000  | -1.8545 | 0.0000  | -1.8545 | 0.0000  | -1.8545 | 0.0000  | -1.8545 | 0.0000  | -1.8545 | 0.0000  | -1.8545 | 0.0000  | -1.8545 | 0.0000  | -1.8545 | 0.0000  | -1.8545 | 0.0000  | -1.8545 | 0.0000 |
| AT1980590 | -0.7799 | 0.2207 | -1.5968 | 0.0000 | -0.9489 | 0.2723 | -1.0002 | 0.2389  | -0.5229 | 0.6247  | -1.6847 | 0.0305  | -1.1755 | 0.0447  | -1.0937 | 0.1738  | -2.1375 | 0.0003  | -0.6201 | 0.5643  | -0.9209 | 0.5237  | -0.6995 | 0.1347  | -1.1892 | 0.1035  | -1.6931 | 0.0000 |
| AT1980635 | -2.2783 | 0.0001 | -2.8750 | 0.0000 | -1.9285 | 0.0000 | -1.8242 | 0.0156  | -0.7935 | 0.3637  | -1.4376 | 0.0103  | -1.7035 | 0.0024  | -1.2742 | 0.0030  | -0.9207 | 0.0007  | -2.6894 | 0.0000  | -1.5720 | 0.0011  | -2.3970 | 0.0000  | -2.5232 | 0.0002  | -1.3310 | 0.0002 |
| AT1980695 | -0.2514 | 0.0003 | -0.4781 | 0.2365 | -1.2346 | 0.2652 | 0.0000  | -0.7697 | 0.4051  | -1.0924 | 0.0000  | -0.9999 | 0.1722  | -2.5393 | 0.0000  | -2.4615 | 0.0000  | -2.4564 | 0.0000  | -2.5979 | 0.0000  | -2.0214 | 0.0003  | -0.0427 | 0.5319  | -2.1117 | 0.0002  |        |
| AT1980702 | -0.0368 | 0.0000 | -0.0368 | 0.0000 | -0.0368 | 0.0000 | -0.0368 | 0.0000  | -0.0368 | 0.0000  | -0.0368 | 0.0000  | -0.0368 | 0.0000  | -0.0368 | 0.0000  | -0.0368 | 0.0000  | -0.0368 | 0.0000  | -0.0368 | 0.0000  | -0.0368 | 0.0000  | -0.0368 | 0.0000  | -0.0368 | 0.0000 |
| AT1980775 | -1.7801 | 0.3417 | -0.     |        |         |        |         |         |         |         |         |         |         |         |         |         |         |         |         |         |         |         |         |         |         |         |         |        |

|          |         |        |         |         |         |         |         |         |         |         |         |         |         |         |         |         |         |         |         |         |         |         |         |         |         |         |         |         |        |
|----------|---------|--------|---------|---------|---------|---------|---------|---------|---------|---------|---------|---------|---------|---------|---------|---------|---------|---------|---------|---------|---------|---------|---------|---------|---------|---------|---------|---------|--------|
| ATG30370 | -2.7523 | 0.0001 | -2.2338 | 0.0008  | -1.6540 | 0.0648  | -0.7138 | 0.3396  | -1.0926 | 0.0124  | -0.7814 | 0.3787  | -1.3482 | 0.0643  | -2.8070 | 0.0001  | -1.5407 | 0.0430  | -2.9758 | 0.0001  | -2.7435 | 0.0004  | -2.1522 | 0.0008  | -2.8004 | 0.0278  | -1.5706 | 0.0243  |        |
| ATG30380 | -0.7462 | 0.1875 | -1.0274 | 0.0644  | -1.0611 | 0.1039  | -0.9600 | 0.1840  | -0.9079 | 0.0995  | -1.5555 | 0.0008  | -0.7524 | 0.1760  | -0.4474 | 0.9252  | -1.9370 | 0.0003  | -0.6834 | 0.1496  | -0.8055 | 0.9444  | -0.8625 | 0.2453  | -1.0238 | 0.1188  | -2.2144 | 0.0000  |        |
| ATG30390 | -1.6076 | 0.0000 | -1.2885 | 0.0000  | -1.0605 | 0.0000  | -0.8400 | 0.0000  | -0.6200 | 0.0000  | -0.4000 | 0.0000  | -0.1800 | 0.0000  | -0.0600 | 0.0000  | -0.0400 | 0.0000  | -0.0200 | 0.0000  | -0.0100 | 0.0000  | -0.0050 | 0.0000  | -0.0025 | 0.0000  | -0.0012 | 0.0000  |        |
| ATG30395 | -1.9233 | 0.0000 | -1.5870 | 0.0001  | -1.3560 | 0.0003  | -1.1224 | 0.0100  | -2.0000 | 0.0000  | -0.0000 | 0.0000  | -1.5445 | 0.0042  | -1.9007 | 0.0000  | -2.0010 | 0.0000  | -1.5038 | 0.0000  | -1.6160 | 0.0000  | -1.4544 | 0.8344  | -2.2240 | 0.0000  | -1.8520 | 0.0000  |        |
| ATG30398 | -1.8728 | 0.0001 | -1.2848 | 0.0013  | -1.4017 | 0.0011  | -1.0012 | 0.0130  | -1.1500 | -1.8637 | 0.0002  | -1.5976 | 0.0000  | -1.3746 | 0.0000  | -1.5788 | 0.0003  | -1.6437 | 0.0009  | -0.7525 | 0.5672  | -0.5552 | 0.4587  | -1.6478 | 0.0006  | -2.2197 | 0.0000  | -1.2996 | 0.0063 |
| ATG30398 | -0.7829 | 0.1350 | -0.7307 | 0.2034  | -0.6054 | 0.7379  | -0.3384 | 0.7479  | -0.2431 | 0.3978  | 0.5290  | 0.3756  | -0.1574 | 0.8057  | -0.2103 | 0.8759  | -0.6990 | 0.1884  | -0.7533 | 0.3279  | 0.6818  | 0.3189  | -0.5512 | 0.3333  | -0.3498 | 0.7120  | -2.1026 | 0.0000  |        |
| ATG30398 | -1.0778 | 0.0078 | -0.8065 | -0.0001 | -1.1300 | 0.0764  | -0.8000 | 0.0000  | -0.6000 | 0.0000  | -0.4000 | 0.0000  | -0.2000 | 0.0000  | -0.1000 | 0.0000  | -0.0500 | 0.0000  | -0.0250 | 0.0000  | -0.0125 | 0.0000  | -0.0062 | 0.0000  | -0.0031 | 0.0000  | -0.0015 | 0.0000  |        |
| ATG30398 | -1.2085 | 0.0031 | -1.7494 | 0.0000  | -0.9965 | 0.0888  | -1.2412 | 0.0140  | -0.8899 | 0.2166  | -0.6100 | 0.2110  | -2.0415 | 0.0000  | -1.7773 | 0.0000  | -1.4831 | 0.0004  | -1.1537 | 0.0169  | -0.2031 | 0.7198  | -0.0441 | 0.0000  | -1.6339 | 0.0001  | -0.8879 | 0.0264  |        |
| ATG30398 | -2.0943 | 0.0000 | -1.3873 | 0.0034  | -0.8372 | 0.5068  | -0.6317 | 1.3907  | -0.4030 | 0.5568  | -1.3218 | 0.0104  | -2.0900 | 0.0000  | -0.9888 | 0.0275  | -1.0213 | 0.0321  | -0.9449 | 0.6474  | -0.7265 | 0.2235  | -2.1151 | 0.0000  | -0.5099 | 0.4791  | -1.1400 | 0.0019  |        |
| ATG30398 | -2.5606 | 0.0000 | -0.7438 | 0.7329  | -0.1062 | 0.0109  | -0.8029 | 0.2424  | -0.1143 | 0.0317  | 0.0753  | 0.1676  | -1.9932 | 0.0003  | -0.7220 | 0.4028  | -0.5971 | 0.1265  | -0.9202 | 0.2292  | -0.5029 | 0.5339  | -0.0414 | 0.0001  | -0.4316 | 0.6401  | -0.4361 | 0.4130  |        |
| ATG30398 | -1.8795 | 0.0000 | -1.4846 | 0.0000  | -1.1407 | 0.0415  | -0.8000 | 0.0000  | -0.6000 | 0.0000  | -0.4000 | 0.0000  | -0.2000 | 0.0000  | -0.1000 | 0.0000  | -0.0500 | 0.0000  | -0.0250 | 0.0000  | -0.0125 | 0.0000  | -0.0062 | 0.0000  | -0.0031 | 0.0000  | -0.0015 | 0.0000  |        |
| ATG30398 | -1.9696 | 0.0010 | -2.2685 | 0.0001  | -1.4624 | 0.0414  | -0.7827 | 0.0213  | -0.5065 | 0.6037  | -1.4249 | 0.0380  | -1.6326 | 0.0007  | -1.4782 | 0.0044  | -2.3953 | 0.0001  | -1.5689 | 0.0033  | -1.3438 | 0.0801  | -2.1295 | 0.0001  | -0.4316 | 0.0192  | -2.262  | 0.0001  |        |
| ATG30398 | -1.0272 | 0.0007 | -0.7448 | 0.3394  | -1.0648 | 0.1982  | -0.3234 | 0.7773  | -1.4034 | 0.0068  | -0.6869 | 0.3604  | -1.7152 | 0.0048  | -1.7005 | 0.0177  | -1.1330 | 0.0945  | -1.0373 | 0.2736  | -1.6009 | 0.0354  | -1.8123 | 0.0042  | -2.1605 | 0.0001  | -0.9176 | 0.1405  |        |
| ATG30398 | -2.2542 | 0.0000 | -1.9007 | 0.0001  | -1.2096 | 0.0868  | -1.1144 | 0.1004  | -1.2910 | 0.0002  | -1.4000 | 0.0127  | -1.7948 | 0.0008  | -1.7905 | 0.0002  | -2.9965 | 0.0000  | -2.0798 | 0.0001  | -1.0199 | 0.9122  | -2.4887 | 0.0000  | -2.3181 | 0.0001  | -1.8296 | 0.0101  |        |
| ATG30398 | -2.3232 | 0.0000 | -2.3246 | 0.0000  | -1.2414 | 0.0879  | -1.4088 | 0.0000  | -0.9400 | 0.0000  | -0.6800 | 0.0000  | -0.4200 | 0.0000  | -0.2600 | 0.0000  | -0.1600 | 0.0000  | -0.0900 | 0.0000  | -0.0500 | 0.0000  | -0.0300 | 0.0000  | -0.0150 | 0.0000  | -0.0075 | 0.0000  |        |
| ATG30398 | -1.5549 | 0.0041 | -1.1464 | 0.0065  | -0.6845 | 0.3820  | -0.6600 | 0.2168  | -1.6296 | 0.0057  | -0.3473 | 0.6494  | -1.2087 | 0.0000  | -1.4946 | 0.0153  | -0.7528 | 0.2281  | -1.1819 | 0.1000  | -0.9324 | 0.2134  | -1.9996 | 0.0001  | -1.5766 | 0.0082  | -0.6320 | 0.2831  |        |
| ATG30398 | -0.6214 | 0.4819 | -1.9239 | 0.0295  | -0.8007 | 0.6042  | -1.0613 | 0.3963  | -0.2370 | 0.9360  | -2.2865 | 0.0062  | -0.2864 | 0.7836  | -1.2810 | 0.2173  | -2.2824 | 0.0003  | -0.3803 | 0.9566  | -0.0776 | 0.9665  | -0.3588 | 0.7255  | -0.1579 | 0.4935  | -0.2623 | 0.0000  |        |
| ATG30398 | -0.4167 | 0.6378 | -0.9437 | 0.4759  | -1.0289 | 0.0000  | -0.3908 | 0.0000  | -0.0846 | 0.9691  | -0.6875 | 0.2000  | -0.5254 | 0.5224  | -0.6537 | 0.7894  | -0.1277 | 0.9971  | -0.0696 | 0.9824  | -2.2222 | 0.0003  | -0.6814 | 0.4124  | -0.0443 | 0.0000  | -2.3398 | 0.0003  |        |
| ATG30398 | -2.0837 | 0.0000 | -1.2117 | 0.0342  | -1.6993 | 0.0029  | -1.5642 | 0.0360  | -1.7980 | 0.0037  | -2.4770 | 0.0000  | -2.1392 | 0.0000  | -2.3754 | 0.0000  | -1.9532 | 0.0003  | -0.9660 | 0.1924  | -0.2888 | 0.7698  | -1.2709 | 0.0195  | -1.7314 | 0.0000  | -1.9733 | 0.0008  |        |
| ATG30398 | -1.3809 | 0.0000 | -1.2474 | 0.0001  | -1.1471 | 0.0002  | -1.1377 | 0.0001  | -1.4181 | 0.0000  | -1.5872 | 0.0000  | -2.0916 | 0.0000  | -2.0612 | 0.0000  | -1.4440 | 0.0000  | -1.3835 | 0.0000  | -0.3365 | 0.4657  | -1.1806 | 0.0000  | -1.8182 | 0.0000  | -1.4061 | 0.0000  |        |
| ATG30398 | -0.7879 | 0.8113 | -0.6810 | 0.1164  | -0.3846 | 0.5799  | -0.4273 | 0.5752  | -0.3837 | 0.6918  | -1.0298 | 0.0387  | 0.3372  | 0.5237  | -0.5378 | 0.4999  | -1.3471 | 0.0038  | -0.8429 | 0.1838  | -0.3147 | 0.8992  | -0.2610 | 0.6652  | -0.8326 | 0.1551  | -2.2846 | 0.0000  |        |
| ATG30398 | -1.3935 | 0.0144 | -0.9303 | 0.1320  | -0.1261 | 0.9026  | -0.4658 | 0.1603  | -0.2782 | 0.3137  | 0.5090  | 0.4710  | -2.1211 | 0.0001  | -1.0713 | 0.1419  | -0.6293 | 0.3205  | -0.1800 | 0.9564  | -0.9082 | 0.2447  | -1.2075 | 0.0383  | -1.3329 | 0.7609  | -1.0257 | 0.1419  |        |
| ATG30398 | -2.0306 | 0.0001 | -2.6803 | 0.0001  | -1.6418 | 0.0795  | -1.1590 | 0.1203  | -0.4052 | 0.9717  | -1.4709 | 0.0747  | -2.3891 | 0.0009  | -2.0218 | 0.0128  | -2.5127 | 0.0009  | -1.8379 | 0.0478  | -1.7396 | 0.2410  | -2.5381 | 0.0000  | -1.9262 | 0.0401  | -1.0263 | 0.0293  |        |
| ATG30398 | -0.7390 | 0.1820 | -0.3204 | -0.1494 | -0.5362 | -0.7244 | -0.4855 | -0.6230 | -0.3879 | -0.3604 | -0.1316 | -1.6809 | -0.0711 | -0.7077 | -0.3640 | -0.9247 | -0.4245 | -2.2454 | -0.0104 | -0.6275 | -0.6136 | -0.7346 | -0.4497 | -0.3463 | -0.4055 | -0.7487 | -0.1049 | -0.1434 |        |
| ATG30398 | -2.7473 | 0.0000 | -0.5643 | 0.3037  | -0.8314 | -0.1388 | -0.3398 | -0.4844 | -0.6488 | -0.1234 | -1.0338 | 0.0778  | -2.5748 | 0.0000  | -0.9848 | -0.1436 | -0.5368 | -0.1464 | -0.8927 | -0.2547 | -0.6051 | -0.3843 | -2.6666 | 0.0000  | -0.6906 | -0.8841 | -0.4564 | -0.7813 |        |
| ATG30398 | -1.6492 | 0.0000 | -1.2885 | 0.0000  | -1.4412 | 0.0000  | -1.1719 | 0.2201  | -0.9775 | 0.3489  | -1.1107 | 0.0000  | -1.2681 | 0.0000  | -1.6996 | 0.0154  | -1.3706 | 0.0000  | -1.1837 | 0.0131  | -1.3564 | 0.2019  | -0.8119 | 0.8713  | -0.7793 | 0.3201  | -1.2448 | 0.0001  |        |
| ATG30398 | -0.1286 | 0.8998 | -0.4834 | -0.6142 | -1.1258 | 0.0323  | -0.3554 | -0.7805 | -0.1282 | -0.8456 | -0.7066 | NA      | -0.0252 | 0.9794  | -0.0251 | 0.9632  | -1.2297 | 0.0000  | -1.1185 | -0.1794 | -0.3205 | -0.8311 | -0.0000 | -0.0000 | -0.5066 | -0.7089 | -2.9396 | 0.0004  |        |
| ATG30398 | -0.3378 | 0.1344 | -0.3378 | 0.1344  | -1.4553 | 0.0694  | -0.7548 | -0.4566 | -0.7475 | -0.4872 | -1.1226 | -0.1653 | -0.0432 | -0.9605 | -1.5567 | -0.0462 | -0.8632 | -0.2297 | -0.5214 | -0.6818 | -0.5021 | -0.5186 | -1.1758 | 0.0881  | -2.3912 | 0.0008  | -2.2825 | 0.0005  |        |
| ATG30398 | -0.4148 | 0.0005 | -1.0549 | 0.0000  | -1.2877 | 0.0007  | -1.3376 | 0.0012  | -1.3891 | 0.0007  | -1.1457 | -0.0034 | -1.3350 | 0.0009  | -1.4341 | 0.0018  | -1.7105 | 0.0000  | -0.8077 | -0.1235 | -0.3484 | -0.5994 | -1.4230 | 0.0006  | -1.4378 | 0.0012  | -2.1591 | 0.0000  |        |
| ATG30398 | -1.6077 | 0.0100 | -1.0856 | -0.1245 | -0.9891 | -0.0000 | -0.1259 | -0.0794 | -0.1257 | -0.0794 | -0.1257 | -0.0794 | -0.1257 | -0.0794 | -0.1257 | -0.0794 | -0.1257 | -0.0794 | -0.1257 | -0.0794 | -0.1257 | -0.0794 | -0.1257 | -0.0794 | -0.1257 | -0.0794 | -0.1257 | -0.0794 |        |
| ATG30398 | -2.0660 | 0.0003 | -1.5948 | 0.0654  | -0.0497 | 0.8686  | -0.0997 | 0.9396  | -0.0606 | 0.3077  | -0.4072 | -0.9522 | -2.4727 | 0.0000  | -0.7650 | -0.4033 | -1.3148 | -0.0324 | -0.8879 | -0.3104 | -1.0064 | -0.2092 | -1.0133 | 0.0779  | -0.4040 | -0.7276 | -0.1535 | 0.8177  |        |
| ATG30398 | -1.1838 | 0.0098 | -0.2663 | 0.0000  | -1.0253 | 0.0468  | -0.3657 | 0.8204  | -2.3460 | 0.0000  | -0.4580 | -0.4202 | -1.5797 | 0.0000  | -1.8864 | 0.0000  | -1.2874 | 0.0005  | -1.2438 | -0.0038 | -1.3555 | -0.0123 | -1.6227 | 0.0003  | -2.1640 | 0.0000  | -1.6021 | 0.0006  |        |
| ATG30398 | -1.6578 | 0.0129 | -0.4955 | 0.0293  | -0.8965 | -0.3482 | -0.6111 | -0.5025 | -1.1598 | -0.2212 | -0.4500 | NA      | -1.6996 | 0.0000  | -0.9295 | -0.5620 | -1.0745 | -0.4485 | -1.1538 | -0.2113 | -1.0868 | -0.2522 | -0.7024 | -0.0032 | -1.0252 | -0.0881 | -0.7156 | 0.2743  |        |
| ATG30398 | -0.2186 | 0.0000 | -1.4412 | 0.0000  | -1.1719 | 0.2201  | -0.9775 | 0.3489  | -1.1107 | 0.0000  | -1.2681 | 0.0000  | -1.6996 | 0.0154  | -1.3706 | 0.0000  | -1.1837 | 0.0131  | -1.3564 | 0.2019  | -0.8119 | 0.8713  | -0.7793 | 0.3201  | -1.2448 | 0.0001  | -1.2448 | 0.0001  |        |
| ATG30398 | -1.7482 | 0.0008 | -1.7320 | 0.0005  | -1.0452 | 0.3256  | -1.3535 | 0.2219  | -1.5997 | 0.0001  | -0.3540 | -0.8891 | -1.9256 | 0.0004  | -1.4468 | -0.0756 | -0.2343 | -0.7885 | -0.9843 | -0.3322 | -1.1270 | -0.2195 | -2.0009 | 0.0007  | -1.6391 | -0.0298 | -0.4219 | 0.5484  |        |
| ATG30398 | -0.2843 | 0.0000 | -0.2843 | 0.0000  | -0.2843 | 0.0000  | -0.2843 | 0.0000  | -0.2843 | 0.0000  | -0.2843 | 0.0000  | -0.2843 | 0.0000  | -0.2843 | 0.0000  | -0.2843 | 0.0000  | -0.2843 | 0.0000  | -0.2843 | 0.0000  | -0.2843 | 0.0000  | -0.2843 | 0.0000  | -0.2843 | 0.0000  |        |
| ATG30398 | -0.1938 | 0.7133 | -2.5177 | 0.0000  | -0.7858 | -0.4580 | -0.3100 | -0.8942 | -0.1593 | -0.9318 | -0.1410 | NA      | -0.4250 | -0.6274 | -0.4389 | -0.8210 | -0.9937 | -0.4872 | -0.4286 | -0.7517 | -0.4484 | -0.0023 | -1.4484 | -0.0984 | -0.7745 | -0.7430 | -0.4488 | 0.7684  |        |
| ATG30398 | -0.1947 | 0.1009 | -0.3478 | -0.4978 | -0.3478 | -0.4978 | -0.3478 | -0.4978 | -0.3478 | -0.4978 | -0.3478 | -0.4978 | -0.3478 | -0.4978 | -0.3478 | -0.4978 | -0.3478 | -0.4978 | -0.3478 | -0.4978 | -0.3478 | -0.4978 | -0.3478 | -0.4978 | -0.3478 | -0.4978 | -0.3478 | -0.4978 |        |
| ATG30398 | -0.1947 | 0.1009 | -0.3478 | -0.     |         |         |         |         |         |         |         |         |         |         |         |         |         |         |         |         |         |         |         |         |         |         |         |         |        |









|           |         |        |         |        |         |        |         |        |         |        |         |        |         |        |         |        |         |         |         |         |         |         |         |         |         |         |         |         |        |
|-----------|---------|--------|---------|--------|---------|--------|---------|--------|---------|--------|---------|--------|---------|--------|---------|--------|---------|---------|---------|---------|---------|---------|---------|---------|---------|---------|---------|---------|--------|
| AT3647350 | 0.4136  | 0.2711 | -0.7931 | 0.0000 | -1.4857 | 0.0000 | -1.0380 | 0.9995 | -0.7635 | 0.0000 | -0.2235 | 0.6444 | -0.9021 | 0.0000 | 0.0034  | 0.9979 | -0.3452 | 0.7999  | 0.0864  | 0.9316  | 0.8142  | 0.0507  | 0.3727  | 0.3816  | -0.0646 | 0.9407  | 0.0338  | 0.0959  |        |
| AT3647360 | 0.1939  | 0.6586 | -0.5324 | 0.0000 | -0.3764 | 0.0000 | -0.1897 | 0.8743 | -0.4739 | 0.0000 | 0.1330  | 0.8354 | -0.5909 | 0.0000 | -0.3453 | 0.6028 | -0.0943 | 0.8434  | 0.3156  | 0.8899  | -0.1434 | 0.8719  | 0.0219  | 0.6204  | -0.5944 | 0.2031  | -0.4768 | 0.1720  |        |
| AT3647370 | -0.2549 | 0.0000 | -0.1605 | 0.0000 | -0.1605 | 0.0000 | -0.1605 | 0.0000 | -0.1605 | 0.0000 | -0.1605 | 0.0000 | -0.1605 | 0.0000 | -0.1605 | 0.0000 | -0.1605 | 0.0000  | -0.1605 | 0.0000  | -0.1605 | 0.0000  | -0.1605 | 0.0000  | -0.1605 | 0.0000  | -0.1605 | 0.0000  |        |
| AT3647380 | -0.2195 | 0.0023 | -0.2170 | 0.0034 | -0.2510 | 0.0082 | -0.3380 | 0.1883 | -0.0421 | 0.7522 | -1.7640 | 0.0007 | -1.9401 | 0.0058 | -0.0585 | 0.0133 | -0.2772 | 0.0000  | -0.1326 | 0.2666  | -1.4804 | 0.1156  | -0.2282 | 0.0000  | -0.8201 | 0.0261  | -0.2678 | 0.0000  |        |
| AT3647390 | -0.2656 | 0.0000 | -0.1635 | 0.0000 | -0.1648 | 0.0000 | -0.7733 | 0.1654 | -0.1870 | 0.0000 | -0.6785 | 0.1484 | -0.2173 | 0.0000 | -0.6888 | 0.2245 | -0.5352 | 0.2227  | -0.1509 | 0.8888  | -0.0466 | 0.7074  | -0.1321 | 0.0008  | -0.7077 | 0.1757  | -0.8037 | 0.0279  |        |
| AT3647400 | -0.2656 | 0.0000 | -0.2997 | 0.0000 | -0.2481 | 0.0003 | -0.0374 | 0.2740 | -0.1580 | 0.0662 | -0.2058 | 0.0001 | -1.6873 | 0.0024 | -0.7055 | 0.0079 | -0.3380 | 0.0000  | -1.0474 | 0.0333  | -1.4235 | 0.0433  | -0.2345 | 0.0000  | -0.9259 | 0.0016  | -1.9672 | 0.0004  |        |
| AT3647410 | -0.4751 | 0.0000 | -0.4425 | 0.0000 | -0.4405 | 0.0000 | -0.4405 | 0.0000 | -0.4405 | 0.0000 | -0.4405 | 0.0000 | -0.4405 | 0.0000 | -0.4405 | 0.0000 | -0.4405 | 0.0000  | -0.4405 | 0.0000  | -0.4405 | 0.0000  | -0.4405 | 0.0000  | -0.4405 | 0.0000  | -0.4405 | 0.0000  |        |
| AT3647420 | -0.9873 | 0.0154 | -0.1730 | 0.0000 | -0.7050 | 0.0000 | -0.7095 | 0.1742 | -0.4870 | 0.0000 | -0.4706 | 0.3363 | -0.7767 | 0.0000 | -0.2658 | 0.7816 | -0.6411 | 0.1423  | -0.1848 | 0.8468  | -0.5002 | 0.3340  | -0.8766 | 0.0505  | -0.3605 | 0.6166  | -0.9979 | 0.1303  |        |
| AT3647430 | -0.5921 | 0.2606 | -0.0406 | 0.0000 | -0.8352 | 0.0000 | 0.4210  | 0.3775 | -0.3397 | 0.0000 | -0.6005 | 0.2134 | -0.4370 | 0.0000 | -0.1841 | 0.8816 | -0.7461 | 0.1397  | -0.0849 | 0.0699  | -0.2306 | 0.7386  | -0.8446 | 0.5109  | -0.6785 | 0.2990  | -0.4766 | 0.0000  |        |
| AT3647440 | -0.7699 | 0.2816 | -0.0883 | 0.0000 | -0.4961 | 0.0026 | -0.1190 | 0.9329 | -0.1319 | 0.0848 | -0.2121 | 0.8238 | -0.4546 | 0.5388 | -0.7215 | 0.5444 | -0.1312 | 0.7031  | -0.0601 | 0.9983  | -0.0379 | 0.9441  | -0.2315 | 0.8037  | -0.1347 | 0.9396  | -0.8477 | 0.0000  |        |
| AT3647450 | -0.4841 | 0.0000 | -0.4841 | 0.0000 | -0.4841 | 0.0000 | -0.4841 | 0.0000 | -0.4841 | 0.0000 | -0.4841 | 0.0000 | -0.4841 | 0.0000 | -0.4841 | 0.0000 | -0.4841 | 0.0000  | -0.4841 | 0.0000  | -0.4841 | 0.0000  | -0.4841 | 0.0000  | -0.4841 | 0.0000  | -0.4841 | 0.0000  |        |
| AT3647460 | -0.0771 | 0.3202 | -0.0483 | 0.9533 | -0.1761 | 0.8450 | -0.2880 | 0.3383 | -0.7392 | 0.3210 | -0.3058 | 0.6517 | -0.7190 | 0.0017 | -0.3045 | 0.8127 | -0.3233 | 0.0056  | -0.0490 | 0.6616  | -0.8179 | 0.2490  | -0.5141 | -0.0401 | -0.2500 | -0.8219 | -0.2182 | 0.0000  |        |
| AT3647470 | 0.7601  | 0.0690 | -0.7744 | 0.0000 | -0.0747 | 0.0000 | -0.6419 | 0.2320 | -0.5946 | 0.1309 | -0.9978 | 0.0001 | -1.3389 | 0.0020 | -0.7497 | 0.0627 | -0.9318 | 0.0519  | -0.2380 | 0.0022  | -0.5112 | 0.4780  | -0.6983 | -0.6278 | 0.1511  | -0.6200 | 0.2605  | -0.2697 | 0.0000 |
| AT3647480 | -0.3980 | 0.0000 | -0.3980 | 0.0000 | -0.3980 | 0.0000 | -0.3980 | 0.0000 | -0.3980 | 0.0000 | -0.3980 | 0.0000 | -0.3980 | 0.0000 | -0.3980 | 0.0000 | -0.3980 | 0.0000  | -0.3980 | 0.0000  | -0.3980 | 0.0000  | -0.3980 | 0.0000  | -0.3980 | 0.0000  | -0.3980 | 0.0000  |        |
| AT3647490 | -0.1760 | 0.0000 | -0.7038 | 0.0000 | -0.7038 | 0.0000 | -0.7038 | 0.0000 | -0.7038 | 0.0000 | -0.7038 | 0.0000 | -0.7038 | 0.0000 | -0.7038 | 0.0000 | -0.7038 | 0.0000  | -0.7038 | 0.0000  | -0.7038 | 0.0000  | -0.7038 | 0.0000  | -0.7038 | 0.0000  | -0.7038 | 0.0000  |        |
| AT3647500 | -0.2054 | 0.8287 | -0.0783 | 0.4387 | -0.6054 | 0.5585 | -0.6749 | 0.5387 | -0.8113 | 0.6157 | -2.0972 | 0.0000 | -0.6839 | 0.3648 | -0.7406 | 0.5532 | -0.2395 | 0.0031  | -0.8959 | 0.4151  | -0.1762 | 0.9083  | -0.1588 | 0.8786  | -1.3433 | 0.1156  | -1.0028 | 0.0016  |        |
| AT3647510 | -0.5335 | 0.5505 | -0.2877 | 0.0012 | -0.3627 | 0.0020 | -0.4616 | 0.7030 | -0.2375 | 0.0021 | -1.1639 | 0.1778 | -0.2646 | 0.0001 | -0.2774 | 0.8959 | -0.3772 | 0.0796  | -0.7846 | 0.5508  | -0.3347 | 0.8279  | -0.1947 | 0.8596  | -0.8055 | -0.8059 | -0.1027 | 0.1598  |        |
| AT3647520 | -0.2095 | 0.0000 | -0.1000 | 0.0000 | -0.1000 | 0.0000 | -0.1000 | 0.0000 | -0.1000 | 0.0000 | -0.1000 | 0.0000 | -0.1000 | 0.0000 | -0.1000 | 0.0000 | -0.1000 | 0.0000  | -0.1000 | 0.0000  | -0.1000 | 0.0000  | -0.1000 | 0.0000  | -0.1000 | 0.0000  | -0.1000 | 0.0000  |        |
| AT3647530 | -0.5311 | 0.5473 | -0.1527 | 0.0046 | -0.1501 | 0.0063 | -0.1628 | 0.0887 | -0.1659 | 0.9180 | -0.2073 | 0.0000 | -0.4686 | 0.9584 | -1.1482 | 0.7794 | -0.2024 | 0.0000  | -0.1549 | 0.0973  | -0.6681 | 0.5636  | -0.4945 | -0.5461 | -0.0499 | -0.7218 | -0.1482 | 0.0081  |        |
| AT3647540 | -0.1136 | 0.8513 | -0.0182 | 0.7738 | -0.0580 | 0.8460 | -0.4480 | 0.5052 | -0.0779 | 0.8460 | -0.6277 | 0.2123 | -0.2852 | 0.7200 | -0.3312 | 0.7220 | -0.8248 | 0.0683  | -0.9373 | 0.0852  | -0.5487 | -0.4819 | -0.2280 | 0.6940  | -0.9326 | -0.6027 | -0.5580 | 0.0000  |        |
| AT3647550 | 0.2605  | 0.7866 | -0.2167 | 0.0032 | -0.1808 | 0.8974 | -0.8744 | 0.4361 | -0.5551 | 0.6918 | -0.5017 | NA     | 0.5566  | 0.0134 | -0.0318 | 0.9963 | -0.1072 | 0.2028  | -0.3966 | 0.8183  | -0.1713 | 0.9460  | -0.1693 | 0.0270  | -0.1081 | -0.1657 | -0.7653 | 0.3045  |        |
| AT3647560 | -0.2478 | 0.0004 | -0.2338 | 0.0000 | -0.0735 | 0.2485 | -0.4749 | 0.1297 | -0.0109 | 0.9998 | -0.1440 | 0.0870 | -0.5126 | 0.0000 | -0.2483 | 0.6414 | -0.0000 | -0.2640 | 0.0001  | -0.1309 | 0.0104  | -0.2243 | 0.0100  | -0.7392 | 0.0001  | -0.2094 | -0.0022 | -0.1285 | 0.1034 |
| AT3647570 | -0.7699 | 0.2816 | -0.0883 | 0.0000 | -0.4961 | 0.0026 | -0.1190 | 0.9329 | -0.1319 | 0.0848 | -0.2121 | 0.8238 | -0.4546 | 0.5388 | -0.7215 | 0.5444 | -0.1312 | 0.7031  | -0.0601 | 0.9983  | -0.0379 | 0.9441  | -0.2315 | 0.8037  | -0.1347 | 0.9396  | -0.8477 | 0.0000  |        |
| AT3647580 | -0.4841 | 0.0000 | -0.4841 | 0.0000 | -0.4841 | 0.0000 | -0.4841 | 0.0000 | -0.4841 | 0.0000 | -0.4841 | 0.0000 | -0.4841 | 0.0000 | -0.4841 | 0.0000 | -0.4841 | 0.0000  | -0.4841 | 0.0000  | -0.4841 | 0.0000  | -0.4841 | 0.0000  | -0.4841 | 0.0000  | -0.4841 | 0.0000  |        |
| AT3647590 | -0.0771 | 0.3202 | -0.0483 | 0.9533 | -0.1761 | 0.8450 | -0.2880 | 0.3383 | -0.7392 | 0.3210 | -0.3058 | 0.6517 | -0.7190 | 0.0017 | -0.3045 | 0.8127 | -0.3233 | 0.0056  | -0.0490 | 0.6616  | -0.8179 | 0.2490  | -0.5141 | -0.0401 | -0.2500 | -0.8219 | -0.2182 | 0.0000  |        |
| AT3648000 | 0.7601  | 0.0690 | -0.7744 | 0.0000 | -0.0747 | 0.0000 | -0.6419 | 0.2320 | -0.5946 | 0.1309 | -0.9978 | 0.0001 | -1.3389 | 0.0020 | -0.7497 | 0.0627 | -0.9318 | 0.0519  | -0.2380 | 0.0022  | -0.5112 | 0.4780  | -0.6983 | -0.6278 | 0.1511  | -0.6200 | 0.2605  | -0.2697 | 0.0000 |
| AT3648010 | -0.3980 | 0.0000 | -0.3980 | 0.0000 | -0.3980 | 0.0000 | -0.3980 | 0.0000 | -0.3980 | 0.0000 | -0.3980 | 0.0000 | -0.3980 | 0.0000 | -0.3980 | 0.0000 | -0.3980 | 0.0000  | -0.3980 | 0.0000  | -0.3980 | 0.0000  | -0.3980 | 0.0000  | -0.3980 | 0.0000  | -0.3980 | 0.0000  |        |
| AT3648020 | -0.1760 | 0.0000 | -0.7038 | 0.0000 | -0.7038 | 0.0000 | -0.7038 | 0.0000 | -0.7038 | 0.0000 | -0.7038 | 0.0000 | -0.7038 | 0.0000 | -0.7038 | 0.0000 | -0.7038 | 0.0000  | -0.7038 | 0.0000  | -0.7038 | 0.0000  | -0.7038 | 0.0000  | -0.7038 | 0.0000  | -0.7038 | 0.0000  |        |
| AT3648030 | -0.2054 | 0.8287 | -0.0783 | 0.4387 | -0.6054 | 0.5585 | -0.6749 | 0.5387 | -0.8113 | 0.6157 | -2.0972 | 0.0000 | -0.6839 | 0.3648 | -0.7406 | 0.5532 | -0.2395 | 0.0031  | -0.8959 | 0.4151  | -0.1762 | 0.9083  | -0.1588 | 0.8786  | -1.3433 | 0.1156  | -1.0028 | 0.0016  |        |
| AT3648040 | -0.5335 | 0.5505 | -0.2877 | 0.0012 | -0.3627 | 0.0020 | -0.4616 | 0.7030 | -0.2375 | 0.0021 | -1.1639 | 0.1778 | -0.2646 | 0.0001 | -0.2774 | 0.8959 | -0.3772 | 0.0796  | -0.7846 | 0.5508  | -0.3347 | 0.8279  | -0.1947 | 0.8596  | -0.8055 | -0.8059 | -0.1027 | 0.1598  |        |
| AT3648050 | -0.2095 | 0.0000 | -0.1000 | 0.0000 | -0.1000 | 0.0000 | -0.1000 | 0.0000 | -0.1000 | 0.0000 | -0.1000 | 0.0000 | -0.1000 | 0.0000 | -0.1000 | 0.0000 | -0.1000 | 0.0000  | -0.1000 | 0.0000  | -0.1000 | 0.0000  | -0.1000 | 0.0000  | -0.1000 | 0.0000  | -0.1000 | 0.0000  |        |
| AT3648060 | -0.5311 | 0.5473 | -0.1527 | 0.0046 | -0.1501 | 0.0063 | -0.1628 | 0.0887 | -0.1659 | 0.9180 | -0.2073 | 0.0000 | -0.4686 | 0.9584 | -1.1482 | 0.7794 | -0.2024 | 0.0000  | -0.1549 | 0.0973  | -0.6681 | 0.5636  | -0.4945 | -0.5461 | -0.0499 | -0.7218 | -0.1482 | 0.0081  |        |
| AT3648070 | -0.1136 | 0.8513 | -0.0182 | 0.7738 | -0.0580 | 0.8460 | -0.4480 | 0.5052 | -0.0779 | 0.8460 | -0.6277 | 0.2123 | -0.2852 | 0.7200 | -0.3312 | 0.7220 | -0.8248 | 0.0683  | -0.9373 | 0.0852  | -0.5487 | -0.4819 | -0.2280 | 0.6940  | -0.9326 | -0.6027 | -0.5580 | 0.0000  |        |
| AT3648080 | 0.2605  | 0.7866 | -0.2167 | 0.0032 | -0.1808 | 0.8974 | -0.8744 | 0.4361 | -0.5551 | 0.6918 | -0.5017 | NA     | 0.5566  | 0.0134 | -0.0318 | 0.9963 | -0.1072 | 0.2028  | -0.3966 | 0.8183  | -0.1713 | 0.9460  | -0.1693 | 0.0270  | -0.1081 | -0.1657 | -0.7653 | 0.3045  |        |
| AT3648090 | -0.2478 | 0.0004 | -0.2338 | 0.0000 | -0.0735 | 0.2485 | -0.4749 | 0.1297 | -0.0109 | 0.9998 | -0.1440 | 0.0870 | -0.5126 | 0.0000 | -0.2483 | 0.6414 | -0.0000 | -0.2640 | 0.0001  | -0.1309 | 0.0104  | -0.2243 | 0.0100  | -0.7392 | 0.0001  | -0.2094 | -0.0022 | -0.1285 | 0.1034 |
| AT3648100 | -0.7699 | 0.2816 | -0.0883 | 0.0000 | -0.4961 | 0.0026 | -0.1190 | 0.9329 | -0.1319 | 0.0848 | -0.2121 | 0.8238 | -0.4546 | 0.5388 | -0.7215 | 0.5444 | -0.1312 | 0.7031  | -0.0601 | 0.9983  | -0.0379 | 0.9441  | -0.2315 | 0.8037  | -0.1347 | 0.9396  | -0.8477 | 0.0000  |        |
| AT3648110 | -0.4841 | 0.0000 | -0.4841 | 0.0000 | -0.4841 | 0.0000 | -0.4841 | 0.0000 | -0.4841 | 0.0000 | -0.4841 | 0.0000 | -0.4841 | 0.0000 | -0.4841 | 0.0000 | -0.4841 | 0.0000  | -0.4841 | 0.0000  | -0.4841 | 0.0000  | -0.4841 | 0.0000  | -0.4841 | 0.0000  | -0.4841 | 0.0000  |        |
| AT3648120 | -0.0771 | 0.3202 | -0.0483 | 0.9533 | -0.1761 | 0.8450 | -0.2880 | 0.3383 | -0.7392 | 0.3210 | -0.3058 | 0.6517 | -0.7190 | 0.0017 | -0.3045 | 0.8127 | -0.3233 | 0.0056  | -0.0490 | 0.6616  | -0.8179 | 0.2490  | -0      |         |         |         |         |         |        |



|           |         |         |         |         |         |         |         |         |         |         |         |         |         |         |         |         |         |         |         |         |         |         |         |         |         |         |         |
|-----------|---------|---------|---------|---------|---------|---------|---------|---------|---------|---------|---------|---------|---------|---------|---------|---------|---------|---------|---------|---------|---------|---------|---------|---------|---------|---------|---------|
| AT4021380 | -1.4851 | -0.0113 | -0.5373 | 0.0001  | -0.7892 | -0.4161 | -0.0252 | 0.5924  | -0.0007 | -1.4806 | -0.0161 | -1.4544 | -0.0289 | -1.1796 | -0.2053 | -0.3561 | -0.0004 | -1.5442 | -0.0689 | -1.4807 | -0.0807 | -1.5223 | -0.0567 | -1.4645 | -0.1574 | -1.7794 | -0.0061 |
| AT4021381 | -1.8841 | -0.0005 | -2.5922 | 0.0000  | -0.8750 | -0.2280 | -0.0683 | 0.9574  | -1.6130 | -0.0017 | -0.6130 | -0.0017 | -0.6130 | -0.0017 | -0.6130 | -0.0017 | -0.6130 | -0.0017 | -0.6130 | -0.0017 | -0.6130 | -0.0017 | -0.6130 | -0.0017 | -0.6130 | -0.0017 |         |
| AT4021400 | -1.7511 | -0.0000 | -2.5922 | 0.0000  | -0.8750 | -0.2280 | -0.0683 | 0.9574  | -1.6130 | -0.0017 | -0.6130 | -0.0017 | -0.6130 | -0.0017 | -0.6130 | -0.0017 | -0.6130 | -0.0017 | -0.6130 | -0.0017 | -0.6130 | -0.0017 | -0.6130 | -0.0017 | -0.6130 | -0.0017 |         |
| AT4021500 | -2.5339 | 0.0000  | -0.9730 | 0.2140  | -0.2488 | -0.6857 | -1.3403 | -0.0834 | -0.6519 | -0.2166 | -1.3389 | -0.0794 | -1.5965 | 0.0000  | -1.0053 | -0.0255 | -0.3404 | -0.4529 | -0.0486 | -0.0929 | -1.0840 | -0.0280 | -2.2693 | 0.0000  | -2.3888 | 0.0000  |         |
| AT4021580 | -1.7230 | 0.0065  | -0.5185 | 0.5242  | -0.1554 | -0.0383 | 0.7343  | -0.4916 | -0.1738 | -0.8629 | -0.0982 | N/A     | 2.2233  | 0.0002  | 0.2278  | 0.9125  | -0.0500 | -0.9630 | -0.0838 | -0.4664 | -1.3611 | -0.2139 | 1.9366  | 0.0000  | 0.9170  | 0.3769  |         |
| AT4021600 | -1.2998 | 0.0415  | -0.2797 | 0.7704  | -0.9498 | -0.2588 | -0.6847 | -0.4812 | -0.2485 | -0.8309 | -0.3735 | -0.6496 | -0.9124 | -0.8143 | -0.8060 | -0.4453 | -0.4248 | -0.7573 | -0.7943 | -0.4336 | -0.9891 | -0.2482 | -0.0144 | 0.9994  | -0.3527 | -0.2890 |         |
| AT4021840 | -1.7113 | 0.0000  | -0.4281 | 0.4324  | -0.4005 | -0.4004 | -0.1504 | -0.0400 | -0.3499 | -0.3877 | -0.1100 | -0.3499 | -0.3877 | -0.1100 | -0.3499 | -0.3877 | -0.1100 | -0.3499 | -0.3877 | -0.1100 | -0.3499 | -0.3877 | -0.1100 | -0.3499 | -0.3877 | -0.1100 |         |
| AT4021850 | -0.9189 | -0.1339 | -1.8364 | -0.0051 | -1.1270 | -0.1170 | -1.2154 | -0.1356 | -0.8373 | -0.0484 | -1.2603 | -0.0526 | -1.1229 | -0.0502 | -1.2593 | -0.0477 | -1.2711 | -0.0001 | -1.0370 | -0.1957 | -0.5133 | -0.9296 | -0.9794 | 0.1129  | -0.5242 | -0.6066 |         |
| AT4021903 | -1.7123 | -0.3818 | -0.2139 | 0.0010  | -1.1134 | -0.2384 | -0.7000 | -0.3318 | -0.4245 | -0.6857 | -1.4599 | -0.0716 | -1.1137 | -0.1187 | -0.5071 | -0.4405 | -1.2428 | -0.0011 | -0.1835 | -0.9366 | -0.5133 | -0.6725 | -0.9395 | 0.2390  | -1.4606 | -0.0978 |         |
| AT4021920 | -1.2529 | -0.0742 | -0.2010 | -0.0004 | -1.3948 | -0.0934 | -0.5765 | -0.3264 | -0.4845 | -0.7258 | -0.5416 | -0.5246 | -0.8484 | -0.0044 | -0.2938 | -0.3057 | -1.3957 | -0.0209 | -0.0997 | -0.9602 | -0.5336 | -0.8681 | -1.1488 | 0.1118  | -0.8796 | -0.8441 |         |
| AT4021940 | -1.2106 | 0.0000  | -0.281  | 0.4324  | -0.4005 | -0.4004 | -0.1504 | -0.0400 | -0.3499 | -0.3877 | -0.1100 | -0.3499 | -0.3877 | -0.1100 | -0.3499 | -0.3877 | -0.1100 | -0.3499 | -0.3877 | -0.1100 | -0.3499 | -0.3877 | -0.1100 | -0.3499 | -0.3877 | -0.1100 |         |
| AT4022000 | -2.0517 | 0.0000  | -0.8939 | -0.0772 | -1.0058 | -0.0663 | -1.0288 | -0.0875 | -1.2857 | -0.0007 | -1.0717 | -0.0359 | -2.0451 | 0.0000  | -1.3639 | -0.0044 | -1.2914 | -0.0031 | -0.4486 | -0.9568 | -0.0044 | -0.9139 | -1.5682 | 0.0004  | -0.8791 | -0.2889 |         |
| AT4022212 | -1.3783 | 0.0489  | -1.1134 | 0.1409  | -0.1407 | -0.0167 | -0.6276 | -0.7309 | -1.1361 | -0.1112 | -0.4458 | -0.2621 | -0.8423 | -0.2393 | -1.1142 | -0.0028 | -1.4227 | -0.0042 | -0.2419 | -0.0004 | -2.1105 | -0.0044 | -1.3139 | -0.0644 | -1.2923 | -0.1138 |         |
| AT4022238 | -1.0801 | -0.7013 | -0.0713 | -0.0806 | -1.0713 | -0.0806 | -1.0713 | -0.0806 | -1.0713 | -0.0806 | -1.0713 | -0.0806 | -1.0713 | -0.0806 | -1.0713 | -0.0806 | -1.0713 | -0.0806 | -1.0713 | -0.0806 | -1.0713 | -0.0806 | -1.0713 | -0.0806 | -1.0713 | -0.0806 |         |
| AT4022412 | 0.3455  | 0.0000  | -0.7417 | -0.0002 | -0.9985 | -0.0000 | -0.3204 | -0.8259 | -0.1275 | -0.0001 | -0.3204 | -0.8259 | -0.1275 | -0.0001 | -0.3204 | -0.8259 | -0.1275 | -0.0001 | -0.3204 | -0.8259 | -0.1275 | -0.0001 | -0.3204 | -0.8259 | -0.1275 | -0.0001 |         |
| AT4022690 | -0.4031 | -0.5371 | -0.3005 | 0.0000  | -0.9002 | -0.1994 | -0.4876 | -0.5753 | -0.5267 | -0.5649 | -1.0108 | -0.3005 | -0.5317 | -0.3705 | -0.7728 | -0.3517 | -1.8750 | -0.0004 | -0.0035 | -0.6212 | -0.5321 | -0.5236 | -0.5235 | -0.4098 | -0.9552 | -0.1667 |         |
| AT4022770 | 1.6717  | 0.0005  | -1.2123 | -0.0233 | -1.7919 | -0.0004 | -1.2016 | -0.0633 | -2.4403 | 0.0000  | -1.8408 | -0.0005 | -1.9598 | 0.0000  | -2.4002 | 0.0000  | -1.8407 | -0.0245 | -1.7163 | -0.0015 | -1.0302 | -0.1225 | -1.7819 | -0.0002 | -1.0311 | -0.0935 |         |
| AT4022840 | -0.4667 | -0.4919 | -1.7298 | -0.0001 | -0.6649 | -0.3053 | -0.7092 | -0.2527 | -0.9025 | -0.2020 | -1.6152 | -0.0114 | -0.9040 | -0.9142 | -0.5631 | -0.7934 | -1.0553 | -0.0000 | -1.5008 | -0.0583 | -0.4556 | -0.6417 | -0.9381 | -0.6510 | -0.2679 | -0.7732 |         |
| AT4023030 | -2.1411 | 0.0000  | -0.8939 | -0.0339 | -0.9630 | -0.1317 | -0.9773 | -0.1130 | -0.9633 | -0.0281 | -0.6314 | -0.1571 | -1.7399 | 0.0000  | -0.8287 | -0.0374 | -0.9465 | -0.0178 | -1.0527 | -0.0395 | -0.8024 | -0.0586 | -2.1046 | 0.0000  | -0.4582 | -0.4367 |         |
| AT4023130 | -0.6867 | -0.4183 | -0.0001 | -0.0000 | -0.9232 | -0.3643 | -1.0976 | -0.3026 | -0.0883 | -0.9727 | -0.3031 | -1.0443 | -0.1701 | -1.1533 | -0.2796 | -1.4066 | -0.0003 | -0.5103 | -0.7404 | -0.2065 | -0.8654 | -0.0413 | -1.9733 | -0.2672 | -1.8116 | -0.6204 |         |
| AT4023140 | -1.6138 | -0.0314 | -2.0407 | -0.0011 | -1.0641 | -0.2913 | -1.4838 | -0.1394 | -0.5021 | -0.7309 | -1.5013 | -0.0747 | -1.4740 | -0.0459 | -1.3035 | -0.2031 | -2.3470 | -0.0016 | -1.0525 | -0.3617 | -0.9292 | -0.5516 | -2.0235 | 0.0000  | -1.4790 | -0.1038 |         |
| AT4023150 | -1.2943 | -0.0105 | -2.2794 | -0.0004 | -1.6480 | -0.0616 | -1.5566 | -0.0933 | -0.9031 | -0.2349 | -1.7447 | -0.0416 | -1.9000 | -0.0077 | -1.9460 | -0.0205 | -2.0999 | -0.0002 | -1.3466 | -0.1896 | -2.1332 | -0.1689 | -1.9783 | -0.0077 | -1.7513 | -0.0381 |         |
| AT4023170 | -1.1836 | -0.0001 | -2.1988 | -0.0002 | -0.9959 | -0.3008 | -1.0432 | -0.2170 | -0.4051 | -0.7308 | -1.4445 | -0.0510 | -1.2021 | -0.0434 | -1.3410 | -0.0654 | -2.2147 | -0.0002 | -1.3771 | -0.0671 | -0.5338 | -0.7431 | -1.3024 | -0.0360 | -1.2466 | -0.076  |         |
| AT4023190 | -1.5356 | -0.0000 | -1.6933 | 0.0000  | -0.6960 | -0.0334 | -1.7703 | -0.0464 | -1.1144 | -0.0000 | -0.5909 | -0.0888 | -2.2819 | 0.0000  | -2.1303 | -0.0000 | -1.8699 | -0.0000 | -1.4489 | -0.0000 | -1.2990 | -0.0000 | -2.1323 | -0.0000 | -1.5267 | -0.0000 |         |
| AT4023200 | -0.4599 | -0.3594 | -0.6602 | -0.0001 | -0.9057 | -0.3319 | -1.2705 | -0.1834 | -0.7979 | -0.4726 | -1.7588 | -0.0348 | -1.0999 | -0.1439 | -1.4016 | -0.1205 | -2.8054 | -0.0000 | -1.0660 | -0.1122 | -0.2028 | -0.8984 | -0.8118 | -0.5113 | -0.9154 | -0.3549 |         |
| AT4023210 | -1.3384 | 0.0000  | -0.9172 | -0.0162 | -2.2344 | -0.0000 | -0.9172 | -0.0162 | -2.2344 | -0.0000 | -0.9172 | -0.0162 | -2.2344 | -0.0000 | -0.9172 | -0.0162 | -2.2344 | -0.0000 | -0.9172 | -0.0162 | -2.2344 | -0.0000 | -0.9172 | -0.0162 | -2.2344 | -0.0000 |         |
| AT4023230 | -1.4215 | -0.0458 | -2.2502 | -0.0111 | -0.9527 | -0.1148 | -1.5129 | -0.1000 | -0.7272 | -0.9237 | -1.3280 | -0.0933 | -1.7751 | -0.0708 | -1.2777 | -0.1702 | -1.9324 | -0.0007 | -1.1041 | -0.2757 | -0.8072 | -0.4351 | -1.6546 | -0.0193 | -1.2616 | -0.1518 |         |
| AT4023260 | -0.5655 | -0.3394 | -1.2224 | -0.0000 | -0.9184 | -0.1750 | -0.5341 | -0.5195 | -0.9177 | -0.4887 | -1.1093 | -0.0611 | -0.6934 | -0.2530 | -1.4677 | -0.1019 | -1.9170 | -0.0002 | -0.7832 | -0.3248 | -0.4345 | -0.6136 | -0.9022 | -0.3193 | -0.4859 | -0.1698 |         |
| AT4023280 | -1.8995 | -0.0009 | -2.6127 | -0.0000 | -1.7194 | -0.3695 | -1.6087 | -0.0262 | -1.4265 | -0.0342 | -1.2808 | -0.0252 | -2.0279 | 0.0000  | -2.0469 | -0.0009 | -2.0165 | -0.0007 | -1.7170 | -0.0087 | -1.6449 | -0.0155 | -1.5705 | -0.0011 | -1.8811 | -0.0001 |         |
| AT4023310 | -1.2608 | -0.0000 | -0.9172 | -0.0162 | -2.2344 | -0.0000 | -0.9172 | -0.0162 | -2.2344 | -0.0000 | -0.9172 | -0.0162 | -2.2344 | -0.0000 | -0.9172 | -0.0162 | -2.2344 | -0.0000 | -0.9172 | -0.0162 | -2.2344 | -0.0000 | -0.9172 | -0.0162 | -2.2344 | -0.0000 |         |
| AT4023300 | -2.0003 | -0.0006 | -2.5323 | -0.0000 | -1.4622 | -0.0415 | -1.1413 | -0.1732 | -1.1056 | -0.1680 | -1.5564 | -0.0228 | -2.0779 | 0.0003  | -1.4828 | -0.0001 | -2.3033 | -0.0002 | -2.0028 | -0.0032 | -1.8908 | -0.0018 | -2.5905 | 0.0000  | -1.5815 | -0.0206 |         |
| AT4023810 | -0.2486 | -0.0000 | -2.5521 | 0.0000  | -1.2182 | -0.0016 | -1.3711 | -0.0124 | -0.7597 | -0.2997 | -1.1863 | -0.0748 | -2.1350 | 0.0000  | -1.6267 | -0.0005 | -2.0657 | -0.0000 | -1.5822 | -0.0014 | -0.6481 | -0.5237 | -2.4790 | 0.0000  | -1.5390 | -0.0121 |         |
| AT4023870 | -2.5298 | -0.1637 | -1.0796 | -0.1250 | -1.1714 | -0.1336 | -0.5551 | -0.5564 | -0.3666 | -0.8202 | -1.5951 | -0.0043 | -1.0247 | -0.1050 | -0.6116 | -0.6071 | -1.5752 | -0.0128 | -1.1182 | -0.1397 | -0.0469 | -0.9994 | -0.6456 | -0.3841 | -0.4745 | -0.0454 |         |
| AT4024110 | -1.1142 | -0.0000 | -0.9172 | -0.0162 | -2.2344 | -0.0000 | -0.9172 | -0.0162 | -2.2344 | -0.0000 | -0.9172 | -0.0162 | -2.2344 | -0.0000 | -0.9172 | -0.0162 | -2.2344 | -0.0000 | -0.9172 | -0.0162 | -2.2344 | -0.0000 | -0.9172 | -0.0162 | -2.2344 | -0.0000 |         |
| AT4024150 | -1.7660 | -0.0027 | -0.5863 | -0.7132 | -0.3676 | -0.6887 | -0.1950 | -0.8678 | -0.3636 | -0.7361 | -0.4701 | -0.5215 | -2.0242 | -0.0003 | -0.0864 | -0.9631 | -0.8842 | -0.1548 | -0.8115 | -0.3630 | -0.0041 | -0.9497 | -1.8371 | -0.0105 | -0.3597 | -0.7598 |         |
| AT4024300 | -0.6023 | -0.4045 | -1.7831 | -0.0004 | -1.0142 | -0.7028 | -0.3450 | -0.8360 | -0.7164 | -0.7400 | -0.5112 | -0.7695 | -0.2488 | -0.6975 | -0.5342 | -0.2022 | -0.0008 | -0.3650 | -0.7769 | -0.2084 | -0.8739 | -0.3803 | -0.6408 | -0.8940 | -0.3175 | -0.1175 |         |
| AT4024700 | -2.7181 | -0.0001 | -1.9111 | -0.0174 | -1.8618 | -0.0001 | -1.9610 | -0.0489 | -1.6852 | -0.0014 | -2.1228 | -0.0017 | -2.0238 | 0.0000  | -1.8203 | -0.0017 | -2.9251 | -0.0001 | -0.4901 | -0.8841 | -0.2260 | -0.8739 | -1.6086 | -0.0103 | -1.4487 | -0.0163 |         |
| AT4024750 | -0.5074 | -0.2805 | -0.4465 | -0.4938 | -0.2434 | -0.2167 | -0.4938 | -0.2434 | -0.2167 | -0.4938 | -0.2434 | -0.2167 | -0.4938 | -0.2434 | -0.2167 | -0.4938 | -0.2434 | -0.2167 | -0.4938 | -0.2434 | -0.2167 | -0.4938 | -0.2434 | -0.2167 | -0.4938 | -0.2434 |         |
| AT4024970 | -0.6215 | -0.7166 | -1.7633 | -0.0006 | -1.2903 | -0.0111 | -1.9628 | -0.2040 | -0.3663 | -0.7120 | -1.4409 | -0.0124 | -0.9536 | -0.0643 | -0.5514 | -0.5597 | -1.3393 | -0.0120 | -1.1000 | -0.0088 | -0.4364 | -0.0666 | -0.7476 | -0.1884 | -1.1178 | -0.2127 |         |
| AT4025070 | -2.8478 | -0.0000 | -2.7083 | 0.0000  | -1.4294 | -0.0012 | -1.8630 | -0.0038 | -0.9784 | -0.1713 | -1.2122 | -0.0046 | -2.5109 | 0.0000  | -2.3315 | -0.0000 | -2.4800 | -0.0000 | -1.8285 | -0.0027 | -1.7951 | -0.0005 | -2.9409 | 0.0000  | -2.5145 | -0.0000 |         |
| AT4025100 | -1.9913 | 0.0000  | -0.6205 | -0.3226 | -0.4736 | -0.3338 | -0.1134 | -0.7254 | -1.1626 | -0.0717 | -1.1722 | -0.0818 | -2.9799 | 0.0000  | -0.1602 | -0.9172 | -0.7172 | -0.8721 | -0.6719 | -0.8279 |         |         |         |         |         |         |         |



|          |          |        |         |         |         |        |         |        |         |         |         |         |         |         |         |         |         |         |         |         |         |         |         |         |         |         |         |         |
|----------|----------|--------|---------|---------|---------|--------|---------|--------|---------|---------|---------|---------|---------|---------|---------|---------|---------|---------|---------|---------|---------|---------|---------|---------|---------|---------|---------|---------|
| AT502800 | 0.1036   | 0.8713 | -0.7354 | -0.1348 | -0.4334 | 0.1310 | -0.5399 | 0.6869 | -0.9781 | 0.0522  | 0.1335  | 0.8210  | -0.2086 | 0.8623  | -1.0557 | 0.0229  | -0.6484 | 0.3466  | -0.3032 | 0.6907  | 0.1319  | 0.8424  | -0.7793 | 0.1788  | -2.1058 | 0.0000  |         |         |
| AT502810 | 1.1558   | 0.0638 | -1.2541 | 0.0001  | 1.2587  | 0.0781 | -0.3333 | 0.8933 | 0.2451  | 0.8877  | -1.4894 | 0.0318  | 0.9018  | 0.0471  | 0.3438  | 0.8212  | -0.9252 | 0.1546  | -0.6880 | 0.5106  | -0.3078 | 0.7419  | 1.3955  | 0.0359  | -0.2899 | 0.8638  | -1.2374 | 0.0319  |
| AT502820 | 0.7171   | 0.0000 | -0.7171 | 0.0000  | -0.7171 | 0.0000 | -0.7171 | 0.0000 | -0.7171 | 0.0000  | -0.7171 | 0.0000  | -0.7171 | 0.0000  | -0.7171 | 0.0000  | -0.7171 | 0.0000  | -0.7171 | 0.0000  | -0.7171 | 0.0000  | -0.7171 | 0.0000  | -0.7171 | 0.0000  | -0.7171 | 0.0000  |
| AT502830 | 2.0608   | 0.0000 | -0.4067 | 0.3332  | 0.5192  | 0.2530 | -0.4552 | 0.9474 | 0.1340  | 0.8629  | -0.1224 | 0.9790  | 1.2130  | 0.0001  | -0.0428 | 0.9725  | -0.0690 | 0.9957  | -0.5779 | 0.8478  | 0.1472  | 0.8271  | 1.3895  | 0.0000  | -0.0352 | 0.8728  | 0.1856  | -0.0319 |
| AT502840 | -1.7481  | 0.0029 | 0.0281  | 0.8217  | 2.2444  | 0.0003 | 0.1193  | 0.8693 | -0.1336 | 0.0000  | 0.3982  | 0.9614  | 2.7894  | 0.0000  | 1.5480  | 0.0254  | 0.3854  | 0.0644  | 1.3024  | 0.0967  | 0.1586  | 0.8794  | 2.8726  | 0.0000  | 0.1375  | 0.0000  | 1.9780  | 0.0000  |
| AT502850 | 1.3760   | 0.0010 | -0.3996 | 0.8686  | 0.3838  | 0.6339 | -0.3568 | 0.7039 | -1.1236 | 0.0997  | 0.0425  | 0.9624  | -2.2844 | 0.0000  | 0.3899  | 0.5070  | -0.1271 | 0.8651  | -0.0385 | 0.1304  | -0.0285 | 0.1639  | -1.8227 | 0.0006  | -0.6446 | 0.4879  | -0.8398 | 0.1390  |
| AT502860 | AT502870 | 1.2489 | 0.0010  | 0.4724  | 0.3084  | 1.0007 | 0.0167  | 0.0474 | 0.9100  | 1.4484  | 0.0000  | 0.3993  | 1.0940  | 0.0001  | 1.161   | 0.0000  | 0.3841  | 0.0545  | 1.1441  | 0.0000  | 0.3868  | 0.1474  | 0.7960  | 2.2618  | 0.0000  | 0.0461  | 0.2184  | 0.0000  |
| AT502880 | 0.4253   | 0.6331 | 1.6213  | 0.0449  | 2.0499  | 0.0440 | 1.4139  | 0.1717 | -0.0077 | 0.9061  | 2.1490  | 0.0000  | -0.0788 | 0.9396  | 0.8826  | 0.4968  | 1.7732  | 0.0219  | 1.3755  | 0.1823  | -0.4040 | 0.7677  | 0.1448  | 0.8854  | 0.5127  | 0.7256  | 1.9726  | 0.0007  |
| AT502890 | -1.8814  | 0.0004 | -1.8814 | 0.0004  | -1.8814 | 0.0004 | -1.8814 | 0.0004 | -1.8814 | 0.0004  | -1.8814 | 0.0004  | -1.8814 | 0.0004  | -1.8814 | 0.0004  | -1.8814 | 0.0004  | -1.8814 | 0.0004  | -1.8814 | 0.0004  | -1.8814 | 0.0004  | -1.8814 | 0.0004  | -1.8814 | 0.0004  |
| AT502900 | 1.8523   | 0.0999 | 0.8173  | 0.3989  | 0.1615  | 0.8083 | 0.0070  | 0.9977 | 1.1101  | 0.2748  | -0.0062 | NA      | 1.4921  | 0.0047  | 0.8301  | 0.5214  | -0.0792 | 0.9248  | 1.1101  | 0.0094  | 2.6188  | 0.0009  | 1.0496  | 0.1922  | 0.5135  | 0.1719  | -0.0549 | 0.9503  |
| AT502910 | -0.4140  | 0.0110 | 0.4140  | 0.0110  | 0.4140  | 0.0110 | 0.4140  | 0.0110 | 0.4140  | 0.0110  | 0.4140  | 0.0110  | 0.4140  | 0.0110  | 0.4140  | 0.0110  | 0.4140  | 0.0110  | 0.4140  | 0.0110  | 0.4140  | 0.0110  | 0.4140  | 0.0110  | 0.4140  | 0.0110  | 0.4140  | 0.0110  |
| AT502920 | -1.8142  | 0.0126 | 0.3121  | 0.5884  | -0.1112 | 0.9185 | -0.2782 | 0.8400 | -0.7323 | 0.5433  | -0.6309 | 0.4889  | -2.1422 | 0.0001  | -1.6972 | 0.0484  | -0.2871 | 0.7983  | -0.1236 | 0.9160  | -0.7174 | 0.0422  | -1.4129 | 0.0630  | -0.5363 | 0.6840  | -1.1660 | 0.0979  |
| AT502930 | -1.4069  | 0.0000 | -2.0998 | 0.0000  | 0.2938  | 0.7147 | 0.1708  | 0.0042 | -1.0275 | 0.0000  | -0.7606 | 0.1382  | 2.9778  | 0.0000  | 1.8689  | 0.0004  | -1.3042 | 0.0034  | -1.0171 | 0.0031  | -0.9849 | 0.1884  | 1.3445  | 0.0000  | 1.7983  | 0.0000  | -1.1358 | 0.0063  |
| AT502940 | -2.8798  | 0.0000 | -1.8601 | 0.0001  | -1.8601 | 0.0001 | -1.8601 | 0.0001 | -1.8601 | 0.0001  | -1.8601 | 0.0001  | -1.8601 | 0.0001  | -1.8601 | 0.0001  | -1.8601 | 0.0001  | -1.8601 | 0.0001  | -1.8601 | 0.0001  | -1.8601 | 0.0001  | -1.8601 | 0.0001  | -1.8601 | 0.0001  |
| AT502950 | -1.2454  | 0.0001 | -0.3822 | 0.0001  | -0.7400 | 0.0000 | -1.2587 | 0.1475 | -0.4447 | 0.0001  | -1.3495 | 0.0004  | -2.2890 | 0.0000  | -1.4454 | 0.0000  | -0.9130 | 0.0000  | -1.0471 | 0.0030  | -1.1761 | 0.0000  | 0.3862  | 0.1187  | -1.3312 | 0.0420  | -2.0000 | 0.0000  |
| AT502960 | -1.5134  | 0.0481 | -1.5134 | 0.0486  | -1.7717 | 0.0303 | -1.0324 | 0.3013 | -2.4164 | 0.0009  | -2.6654 | 0.0005  | -1.8547 | 0.0047  | -1.2673 | 0.0005  | -2.0147 | 0.0048  | -1.0507 | 0.3187  | -0.7027 | 0.5187  | 0.0801  | 0.9887  | -0.6461 | 0.9965  | -1.9861 | 0.0001  |
| AT502970 | -2.2864  | 0.0007 | -2.3550 | 0.0006  | -0.7665 | 0.4435 | -1.9074 | 0.0707 | -0.9913 | -1.8936 | 0.0317  | -1.9324 | 0.0036  | -2.1153 | 0.0050  | -2.9003 | 0.0000  | -1.5457 | 0.0784  | -1.7123 | 0.0040  | -2.2922 | 0.0007  | -1.4536 | 0.0852  | -0.9653 | 0.1422  | 0.0000  |
| AT502980 | 0.2256   | 0.0072 | 0.1959  | 0.0447  | 0.5884  | 0.0454 | 0.6046  | 0.2044 | -0.2100 | 0.2957  | -0.7528 | 0.0046  | 0.0778  | 0.2261  | 0.0000  | 0.3523  | -0.8798 | 0.0000  | -1.2881 | 0.0076  | -1.2659 | 0.0055  | 0.1848  | 0.0855  | -2.2486 | 0.0000  | -0.1229 | 0.0000  |
| AT502990 | -1.3070  | 0.0564 | -2.4600 | 0.0001  | -1.2726 | 0.1473 | -1.5513 | 0.0737 | -0.6030 | 0.6051  | -1.9052 | 0.0092  | -1.5369 | 0.0185  | -2.0634 | 0.0039  | -2.7216 | 0.0000  | -1.5339 | 0.1203  | -0.8054 | 0.4330  | -1.6012 | 0.1808  | -1.7527 | 0.0134  | -2.4124 | 0.0004  |
| AT503000 | -0.8795  | 0.1122 | -0.3838 | 0.0187  | -0.9684 | 0.0187 | -0.9684 | 0.0187 | -0.9684 | 0.0187  | -0.9684 | 0.0187  | -0.9684 | 0.0187  | -0.9684 | 0.0187  | -0.9684 | 0.0187  | -0.9684 | 0.0187  | -0.9684 | 0.0187  | -0.9684 | 0.0187  | -0.9684 | 0.0187  | -0.9684 | 0.0187  |
| AT503010 | 0.5664   | 0.4678 | -2.1030 | 0.0021  | -0.8840 | 0.1360 | 1.3364  | 0.1377 | -0.7128 | 0.5089  | -1.4776 | 0.0519  | 0.9427  | 0.1693  | 1.2955  | 0.1354  | -1.7111 | 0.0138  | -0.9883 | 0.5571  | -0.8819 | 0.3615  | 1.0740  | 0.1463  | -1.5571 | 0.0457  | -1.4588 | 0.0249  |
| AT503020 | 0.0235   | 0.8729 | 0.2861  | 0.3666  | 0.3335  | 0.6131 | -0.0620 | 0.5083 | 0.1938  | 0.8877  | -0.4538 | 0.0464  | 0.0312  | 0.9377  | 0.0521  | 0.8745  | -0.9933 | 0.2239  | -0.1339 | 0.0865  | -0.0480 | 0.2295  | 0.0633  | -0.4218 | 0.0927  | -2.0532 | 0.0000  |         |
| AT503030 | 2.5473   | 0.0001 | 0.0184  | 0.0000  | 1.0542  | 0.0000 | 2.6974  | 0.0004 | 2.8875  | 0.0000  | 3.1016  | 0.0000  | 2.7582  | 0.0000  | 0.9742  | 0.0000  | 0.7315  | 0.0000  | 0.5845  | 0.0000  | -0.5845 | 0.0000  | 1.0705  | 0.0000  | 0.9314  | 0.0000  | 1.3473  | 0.0000  |
| AT503040 | -2.0359  | 0.0000 | -1.2480 | 0.0000  | -1.0323 | 0.0000 | -1.6622 | 0.0258 | -0.9135 | 0.1089  | -0.2284 | 0.7126  | -2.5350 | 0.0000  | -1.5093 | 0.0108  | -0.2464 | 0.6456  | -0.4994 | 0.5344  | -0.7819 | 0.2058  | -2.1302 | 0.0000  | -0.8346 | 0.0001  | -0.0806 | 0.8787  |
| AT503050 | -1.2129  | 0.0000 | -1.0683 | 0.0207  | -0.7859 | 0.1143 | -1.1418 | 0.0154 | -1.1358 | 0.0191  | -0.7343 | 0.2460  | -1.3981 | 0.0000  | 0.9386  | 0.0778  | -0.8478 | 0.0035  | -1.5103 | 0.0014  | -1.2463 | 0.0000  | -1.3153 | 0.0000  | -0.4765 | 0.4975  | -1.4610 | 0.4210  |
| AT503060 | 0.3012   | 0.8488 | -0.2552 | 0.0000  | 0.0900  | 0.9900 | 0.2689  | 0.0000 | 0.1932  | 0.8719  | 0.8331  | NA      | 0.3142  | 0.8660  | 0.8300  | 0.0000  | 0.6051  | 0.4431  | 1.4608  | 0.0782  | -0.4379 | 0.7038  | 0.1814  | 0.9212  | 0.0201  | 0.9311  | 0.0681  | 0.0000  |
| AT503070 | 2.2601   | 0.0001 | -0.9968 | 0.1805  | -0.6084 | 0.4889 | 0.9595  | 0.2618 | -0.1158 | 0.4471  | 0.6003  | 0.3466  | 1.4042  | 0.0154  | 0.7737  | 0.4294  | -0.1097 | 0.8940  | 1.6236  | 0.1999  | 1.1242  | 0.1329  | 2.0778  | 0.0003  | 0.1314  | 0.9307  | -0.2438 | 0.7124  |
| AT503080 | -0.4664  | 0.4692 | -0.2505 | 0.0001  | -0.8676 | 0.2264 | -0.8260 | 0.2975 | -0.1327 | 0.7733  | -1.4154 | 0.0018  | -0.6837 | 0.2372  | -1.0283 | 0.1354  | -2.0800 | 0.0001  | -0.6124 | 0.5179  | 0.1331  | 0.9199  | -0.7000 | 0.2539  | -1.0538 | -0.1185 | -0.1617 | 0.0000  |
| AT503090 | -1.4919  | 0.0028 | -0.6642 | 0.0470  | 0.8329  | 0.0473 | -1.4466 | 0.1738 | -0.9150 | 0.0407  | -0.9106 | NA      | -0.9523 | 0.2034  | -0.2643 | 0.8985  | -0.5652 | 0.5014  | -0.3302 | 0.8477  | -1.2279 | 0.0237  | -1.6398 | 0.0310  | -0.7447 | 0.5370  | 0.0040  | 0.4680  |
| AT503100 | -0.3466  | 0.0000 | -0.3466 | 0.0000  | -0.3466 | 0.0000 | -0.3466 | 0.0000 | -0.3466 | 0.0000  | -0.3466 | 0.0000  | -0.3466 | 0.0000  | -0.3466 | 0.0000  | -0.3466 | 0.0000  | -0.3466 | 0.0000  | -0.3466 | 0.0000  | -0.3466 | 0.0000  | -0.3466 | 0.0000  | -0.3466 | 0.0000  |
| AT503110 | -1.4764  | 0.0000 | -0.5840 | 0.2995  | -1.0221 | 0.0657 | -0.7444 | 0.3038 | -1.1031 | 0.0283  | -0.9882 | 0.0526  | -1.7089 | 0.0000  | -1.7037 | 0.0005  | -0.7810 | 0.1057  | -1.3395 | 0.0365  | -0.0666 | 0.3514  | -1.3200 | 0.0001  | -1.2855 | 0.0007  | -2.4723 | 0.0000  |
| AT503120 | -2.6533  | 0.0000 | -1.2529 | 0.0025  | -0.5778 | 0.4939 | -0.6643 | 0.3881 | -0.0970 | 0.9490  | -0.3980 | 0.5489  | -1.3635 | 0.0000  | 0.0930  | 0.9592  | -1.5388 | 0.0034  | -1.5917 | 0.0067  | -0.5483 | 0.4748  | -2.4125 | 0.0000  | 0.9596  | 0.1408  | -0.7844 | 0.1164  |
| AT503130 | -1.8728  | 0.0010 | -2.2007 | 0.0001  | -0.9283 | 0.2257 | -1.2855 | 0.1012 | -0.7652 | 0.7394  | -1.2481 | 0.0070  | -1.5807 | 0.0047  | -2.3503 | 0.0001  | -1.6595 | 0.0137  | -1.5500 | 0.0129  | -1.6402 | 0.0000  | -2.0006 | 0.0000  | -0.8390 | 0.0001  | -1.7300 | 0.0001  |
| AT503140 | 0.3977   | 0.0000 | -0.3977 | 0.0000  | -0.3977 | 0.0000 | -0.3977 | 0.0000 | -0.3977 | 0.0000  | -0.3977 | 0.0000  | -0.3977 | 0.0000  | -0.3977 | 0.0000  | -0.3977 | 0.0000  | -0.3977 | 0.0000  | -0.3977 | 0.0000  | -0.3977 | 0.0000  | -0.3977 | 0.0000  | -0.3977 | 0.0000  |
| AT503150 | -1.6415  | 0.0092 | -2.7519 | 0.0004  | -1.7800 | 0.0214 | -0.7911 | 0.4005 | -1.1966 | 0.1367  | -1.7189 | 0.0154  | -1.9409 | 0.0001  | -1.2547 | 0.0014  | -2.3703 | 0.0000  | -1.7687 | 0.0171  | -0.9887 | 0.2538  | -1.8523 | 0.0031  | -2.1544 | 0.0014  | -1.9052 | 0.0001  |
| AT503160 | 1.9309   | 0.0011 | 0.6736  | 0.0878  | 0.5565  | 0.5911 | 0.6824  | 0.0511 | 0.3234  | 0.0608  | 1.8262  | 0.0013  | 1.0555  | 0.2314  | 1.3078  | 0.0020  | 2.1124  | 0.0007  | 2.6873  | 0.0000  | 2.0754  | 0.0000  | 1.7581  | 0.0089  | 1.3784  | 0.0039  | 1.7344  | 0.0039  |
| AT503170 | -1.0599  | 0.0000 | -0.2614 | 0.0000  | 0.7509  | 0.0824 | -1.0343 | 0.0002 | -0.8481 | 0.0432  | -0.4443 | 0.8111  | -2.1532 | 0.0000  | -1.6236 | 0.0000  | -1.4749 | 0.0000  | -1.4128 | 0.0001  | -0.9996 | 0.0171  | -1.7799 | 0.0000  | -1.4577 | 0.0001  | -0.7954 | 0.0227  |
| AT503180 | 1.2146   | 0.0000 | 0.0000  | 0.0000  | 0.0000  | 0.0000 | 0.0000  | 0.0000 | 0.0000  | 0.0000  | 0.0000  | 0.0000  | 0.0000  | 0.0000  | 0.0000  | 0.0000  | 0.0000  | 0.0000  | 0.0000  | 0.0000  | 0.0000  | 0.0000  | 0.0000  | 0.0000  | 0.0000  | 0.0000  | 0.0000  |         |
| AT503190 | 0.5669   | 0.9745 | 0.2097  | 0.0082  | 1.762   |        |         |        |         |         |         |         |         |         |         |         |         |         |         |         |         |         |         |         |         |         |         |         |

|          |         |         |         |         |         |         |         |         |         |         |         |         |         |         |         |         |         |         |         |         |         |         |         |         |         |         |         |         |        |
|----------|---------|---------|---------|---------|---------|---------|---------|---------|---------|---------|---------|---------|---------|---------|---------|---------|---------|---------|---------|---------|---------|---------|---------|---------|---------|---------|---------|---------|--------|
| AT544530 | 0.8160  | 0.0404  | -2.8056 | -0.0000 | -2.9389 | 0.0000  | 0.1348  | -0.8705 | -2.0847 | 0.0000  | 0.6513  | 0.9113  | -3.4529 | 0.0000  | 0.6892  | 0.2238  | -0.7130 | 0.1123  | 1.1303  | 0.0034  | 0.9469  | 0.0609  | 1.1174  | 0.0047  | 0.4843  | 0.4691  | 0.4517  | 0.3067  |        |
| AT544580 | -1.9487 | 0.0006  | -0.4758 | 0.0000  | -1.5495 | 0.0000  | -1.8381 | 0.0094  | -2.5254 | 0.0000  | -1.9786 | 0.0008  | -4.3271 | 0.0000  | -1.1704 | 0.1202  | -2.9222 | 0.0000  | -1.1696 | 0.1327  | -0.4658 | 0.6121  | -1.8052 | 0.0107  | 0.4968  | 0.6418  | -0.8347 | 0.2793  |        |
| AT544650 | -1.1952 | 0.0000  | -0.0000 | -0.0000 | -0.0000 | -0.0000 | -0.0000 | -0.0000 | -0.0000 | -0.0000 | -0.0000 | -0.0000 | -0.0000 | -0.0000 | -0.0000 | -0.0000 | -0.0000 | -0.0000 | -0.0000 | -0.0000 | -0.0000 | -0.0000 | -0.0000 | -0.0000 | -0.0000 | -0.0000 | -0.0000 |         |        |
| AT544720 | 0.3446  | -0.5992 | -0.0183 | 0.0001  | -1.3244 | 0.0001  | -0.9585 | -0.9356 | -0.0041 | 0.9790  | -0.0002 | 0.1062  | -0.2030 | 0.7645  | -0.1178 | 0.4695  | -0.9634 | 0.0080  | -0.3402 | 0.7689  | 0.0002  | -0.5684 | 0.1498  | 0.5225  | -0.5577 | -0.5272 | -0.8199 | 0.9047  |        |
| AT544850 | -0.4810 | 0.0000  | -1.1717 | 0.0498  | -1.9016 | 0.0009  | -0.0000 | -1.0000 | -1.0934 | -0.0029 | 0.0000  | 0.0000  | -1.0000 | 0.0000  | 0.0000  | 0.0000  | 0.0000  | 0.0000  | 0.0000  | 0.0000  | 0.0000  | 0.0000  | 0.0000  | 0.0000  | 0.0000  | 0.0000  | 0.0000  |         |        |
| AT544910 | -0.9429 | 0.0450  | -1.1764 | 0.0363  | -0.0374 | 0.9693  | -0.8456 | -0.1820 | -0.8748 | 0.1376  | -0.3600 | 0.5375  | -2.1841 | 0.0000  | -0.2970 | 0.7831  | -1.1053 | 0.0217  | -0.6032 | 0.4117  | -0.6337 | 0.1340  | -0.8021 | 0.0994  | -0.5200 | -0.4792 | -0.3830 | 0.4178  |        |
| AT544970 | -1.5713 | 0.0000  | -0.0000 | -0.0000 | -1.6972 | 0.0000  | -0.0000 | -0.0000 | -1.8994 | 0.0000  | -0.0000 | -0.0000 | -0.0000 | -0.0000 | -0.0000 | -0.0000 | -0.0000 | -0.0000 | -0.0000 | -0.0000 | -0.0000 | -0.0000 | -0.0000 | -0.0000 | -0.0000 | -0.0000 | -0.0000 |         |        |
| AT544980 | -0.6812 | 0.3903  | -0.7275 | 0.0001  | -1.5768 | 0.0005  | -0.1982 | 0.8877  | -2.7499 | 0.0001  | -0.5370 | 0.5276  | -3.0002 | 0.0000  | -0.2819 | 0.8825  | -0.7505 | 0.3418  | -0.0503 | 0.9813  | 0.1885  | -0.9016 | -0.3053 | 0.7483  | -0.2803 | -0.8386 | -0.3624 | 0.8250  |        |
| AT544990 | -2.0006 | -0.0006 | -2.7133 | 0.0030  | -1.6311 | 0.0530  | -0.4387 | -0.9749 | -0.7243 | -1.1128 | 0.1555  | -1.0395 | -0.2189 | -1.6205 | -0.2023 | -2.0366 | 0.0111  | -1.8084 | -0.0331 | -2.0165 | 0.0166  | -2.1347 | -0.0097 | -2.4051 | 0.0006  | -0.8719 | -0.0379 | -0.1079 | 0.4450 |
| AT545000 | -1.9350 | 0.0058  | -2.8916 | 0.0000  | -1.5460 | 0.0001  | -1.7911 | 0.0450  | -0.7176 | 0.4735  | -1.4545 | 0.0673  | -1.9756 | 0.0032  | -1.9859 | 0.0111  | -2.4643 | 0.0004  | -1.7412 | 0.0410  | -1.8073 | -0.0304 | -1.9027 | 0.0048  | -1.8843 | -0.0146 | -1.8044 | 0.0048  |        |
| AT545060 | -1.1920 | -0.0000 | -0.0000 | -0.0000 | -1.3922 | 0.0000  | -0.0000 | -0.0000 | -1.5944 | 0.0000  | -0.0000 | -0.0000 | -0.0000 | -0.0000 | -0.0000 | -0.0000 | -0.0000 | -0.0000 | -0.0000 | -0.0000 | -0.0000 | -0.0000 | -0.0000 | -0.0000 | -0.0000 | -0.0000 | -0.0000 |         |        |
| AT545100 | -1.1830 | -0.4498 | -0.3499 | -0.0000 | -1.1049 | 0.0000  | -1.1705 | -0.2222 | -1.7129 | 0.0000  | -2.3405 | 0.0000  | -1.3542 | 0.0000  | -1.5846 | 0.0014  | -2.2516 | 0.0016  | -2.0901 | 0.0111  | -1.3663 | 0.7674  | -1.9078 | 0.0111  | -1.7849 | -0.0290 | -1.8504 | 0.0008  |        |
| AT545200 | -1.7117 | 0.1035  | -2.0917 | 0.0041  | -1.0801 | 0.0083  | -1.2323 | -0.2328 | -0.0808 | -0.7604 | 0.0000  | -2.2316 | 0.0031  | -1.2668 | 0.2087  | -1.1106 | 0.0889  | -1.9305 | 0.3578  | -1.2702 | 0.1934  | -1.8530 | 0.0114  | -1.3588 | -0.1330 | -0.3844 | -0.8236 | 0.0000  |        |
| AT545310 | 0.2103  | 0.8179  | -1.1716 | 0.0000  | -2.2679 | 0.0000  | -0.1180 | -0.9422 | -1.7981 | 0.0028  | -0.5660 | -2.2154 | 0.0012  | -0.3963 | 0.0009  | -0.0000 | 0.0000  | -0.0000 | -0.0000 | -0.0000 | -0.0000 | -0.0000 | -0.0000 | -0.0000 | -0.0000 | -0.0000 | -0.0000 | -0.0000 |        |
| AT545315 | -0.1352 | 0.8860  | -2.9688 | 0.0000  | -0.8923 | 0.0000  | -0.5368 | -0.0000 | -0.8484 | 0.3731  | -3.1376 | 0.0000  | -0.6884 | 0.3731  | -3.1376 | 0.0000  | -0.5663 | 0.6813  | -0.8777 | 0.3383  | -1.8454 | 0.0000  | -0.8078 | 0.0000  | -0.0798 | -0.9348 | -0.2695 | 0.6975  |        |
| AT545320 | -0.0444 | -0.9007 | -0.7735 | 0.0001  | -2.7952 | 0.0002  | -1.0688 | -0.9043 | -2.7504 | 0.0001  | -0.0772 | 0.9430  | -3.1478 | 0.0000  | -0.0725 | 0.9478  | -0.6038 | 0.4334  | -0.3727 | 0.8126  | 0.0041  | -0.9831 | -0.5686 | 0.5007  | -0.6123 | -0.6203 | -0.6738 | 0.3380  |        |
| AT545420 | -0.3310 | -0.6881 | -0.3047 | 0.0000  | -0.9550 | -0.3326 | -1.0344 | 0.0000  | -0.7081 | -0.3909 | -3.4508 | 0.0000  | -0.8692 | -0.4278 | -1.9183 | -0.0827 | -1.0229 | -0.3318 | -1.2869 | -0.0862 | -0.6479 | -0.5718 | -0.8238 | -0.4293 | -0.3568 | -0.3568 | -0.8519 | 0.0000  |        |
| AT545430 | 0.0768  | 0.9299  | -2.2626 | 0.0000  | -1.1113 | 0.0000  | -1.2193 | -0.1226 | -0.6554 | 0.8832  | -1.0994 | 0.0079  | 0.5969  | 0.3354  | -0.6709 | 0.5214  | -1.6506 | 0.0016  | -1.9397 | 0.0553  | -0.6143 | 0.2651  | -0.5517 | -0.4451 | -0.2975 | -0.0000 | -2.7706 | 0.0000  |        |
| AT545530 | -0.2942 | -0.6777 | -0.7799 | 0.2718  | -0.6480 | -0.4949 | -0.9228 | -0.8325 | -0.4823 | -0.6552 | -0.5248 | -0.1793 | -1.0394 | -0.0795 | -0.2139 | -0.9009 | -0.5887 | -0.3628 | -0.1255 | -0.9489 | -0.3790 | 0.0000  | -0.2026 | -0.8058 | -0.7881 | -0.3643 | -0.9233 | -0.9718 |        |
| AT545630 | -0.9607 | 0.2326  | -1.9540 | 0.0000  | -1.6400 | 0.3436  | -0.9097 | -0.4180 | -0.0762 | -0.7313 | -1.8207 | -0.0000 | -0.6776 | -0.2650 | -0.8511 | -0.5109 | -2.4177 | 0.0010  | -1.5100 | -0.9489 | -0.7591 | -0.8004 | -0.9933 | -0.2395 | -0.2677 | -0.1728 | -0.6082 | -0.4207 |        |
| AT545620 | -1.2508 | -0.0286 | -1.1486 | 0.7341  | -0.1062 | -0.5163 | -1.1844 | -0.1304 | -0.4727 | -0.8275 | -1.1687 | -0.0775 | -1.0816 | -0.0627 | -0.2711 | -0.8621 | -0.9356 | -0.1368 | -1.0323 | -0.2171 | -1.3224 | -0.0665 | -1.0924 | -0.0752 | -0.9071 | -0.1899 | -0.2010 | -0.0003 |        |
| AT545730 | 0.2646  | 0.0000  | 0.0278  | 0.0092  | -1.0494 | 0.010   | 1.0911  | 0.0017  | -1.4459 | 0.0000  | -1.3216 | 0.0000  | -1.6848 | 0.0000  | -1.0818 | 0.0009  | -0.8741 | 0.5768  | -0.6042 | 0.1179  | -0.1218 | -0.8164 | -1.5903 | 0.0020  | -0.2125 | -0.0001 | -0.6813 | 0.0201  |        |
| AT545830 | -0.4086 | -0.4966 | -0.9922 | 0.1735  | -0.8753 | -0.3980 | -0.3400 | -0.7579 | -0.0622 | -0.9575 | -0.0618 | -0.1930 | -0.5356 | -0.4638 | -0.0280 | -0.9424 | -0.1819 | -0.2343 | -1.0341 | -0.0317 | -2.8712 | -0.0001 | -0.4250 | -0.5995 | -1.0983 | -0.1723 | -0.4642 | -0.4977 |        |
| AT546115 | -0.6455 | -0.4639 | -0.1647 | 0.0391  | -1.9635 | -0.1848 | -0.9383 | -0.4084 | -1.9738 | -0.0106 | -1.0720 | -0.0000 | -1.2095 | 0.0003  | -0.2228 | -0.9214 | -1.0149 | -0.2161 | -0.2523 | -0.9032 | -0.0571 | -0.9745 | -0.0460 | -0.6517 | -0.8894 | -0.4448 | -1.1158 | -0.0670 |        |
| AT546220 | -0.0698 | -0.8148 | -1.2811 | 0.0000  | -1.1066 | -0.1492 | -0.7378 | -0.5426 | -0.8000 | -0.3671 | -1.7114 | -0.0322 | -0.2342 | -0.7596 | -0.3719 | -0.7934 | -2.2117 | 0.0004  | -0.7483 | -0.4456 | -0.2245 | -0.8969 | -0.6153 | -0.3676 | -0.2776 | -0.8895 | -1.4548 | -0.0092 |        |
| AT546230 | -1.3178 | 0.0319  | -1.1738 | 0.0608  | -0.1616 | -0.8756 | -0.4202 | -0.9991 | -0.3014 | -0.7159 | -0.0209 | -0.6165 | -0.9191 | 0.0007  | -0.1613 | -0.9218 | -1.2626 | 0.0001  | -0.3929 | -0.2453 | -0.4147 | -1.1375 | -0.0001 | -0.4074 | -0.7317 | -1.5698 | -0.0001 | -0.0000 |        |
| AT546230 | -1.7551 | 0.0000  | -1.9775 | 0.0000  | -1.7955 | 0.0000  | -1.0583 | -0.0732 | -1.9995 | 0.0000  | -0.4321 | -0.3303 | -2.4857 | 0.0000  | -0.9005 | -0.0002 | -0.7604 | -0.9446 | -0.4203 | -0.4967 | -0.4249 | -0.4060 | -1.6774 | 0.0000  | -0.7034 | -0.1151 | -1.7487 | -0.9000 |        |
| AT546235 | -1.7779 | 0.0183  | -0.2546 | 0.0020  | -2.2803 | 0.0044  | -0.1331 | -0.9466 | -2.7903 | 0.0034  | -0.2981 | 0.0000  | -1.1683 | -0.2851 | -1.2059 | -0.0594 | -0.8462 | -0.5107 | -0.0428 | -0.9840 | -1.6035 | -0.0313 | -0.4470 | -0.1066 | -0.0713 | -0.9470 | -0.9670 | 0.0000  |        |
| AT546310 | -1.8480 | 0.0005  | -2.0505 | 0.0001  | -1.5407 | -0.0104 | -1.0348 | -0.1749 | -1.8522 | -0.0009 | -0.2348 | -0.7526 | -2.5713 | 0.0000  | -1.8386 | -0.0014 | -1.0864 | -0.0574 | -0.7808 | -0.3431 | -1.9296 | -0.0030 | -1.8445 | -0.0005 | -1.7653 | -0.0071 | -1.7506 | -0.1556 |        |
| AT546440 | -0.2010 | -0.0000 | -0.0000 | -0.0000 | -1.3432 | -0.0006 | -1.0687 | -0.0000 | -1.1572 | -0.0000 | -1.0747 | -0.0000 | -1.1572 | -0.0000 | -0.1617 | -0.0000 | -0.8756 | -0.1007 | -0.1617 | -0.0000 | -0.1617 | -0.0000 | -1.9601 | -0.0000 | -0.1617 | -0.0000 | -1.9601 | -0.0000 |        |
| AT546490 | -1.0282 | -0.0675 | -0.5642 | 0.0000  | -1.5405 | 0.0000  | -0.9432 | -0.2324 | -0.9999 | -0.0000 | -0.8127 | -0.5156 | -0.6477 | 0.0000  | -1.6884 | -0.0034 | -1.6001 | -0.0002 | -0.4894 | -0.6331 | -0.0327 | -0.9132 | -1.3436 | -0.0135 | -1.5755 | -0.0001 | -1.7550 | -0.0001 |        |
| AT546500 | -1.7320 | -0.0007 | -0.9428 | 0.0000  | -1.5056 | 0.0000  | -1.6193 | -0.0672 | -3.5037 | 0.0000  | -1.5750 | -0.0412 | -3.8775 | 0.0000  | -2.1309 | -0.0036 | -2.4792 | 0.0002  | -0.6113 | -0.6411 | -0.4404 | -0.7130 | -2.5098 | 0.0001  | -2.3361 | -0.0002 | -2.7498 | 0.0000  |        |
| AT546510 | -0.1786 | -0.7850 | -0.3077 | 0.0000  | -1.6340 | -0.0000 | -0.7689 | -0.2868 | -2.5505 | 0.0000  | -0.7065 | -0.0226 | -0.8776 | 0.0000  | -0.1681 | -0.9038 | -0.9041 | -0.7056 | -0.0427 | -0.5592 | -0.2588 | -0.7758 | -0.5027 | -0.3161 | -0.2282 | -0.7339 | -1.1889 | 0.0000  |        |
| AT546520 | -1.2428 | 0.0000  | -0.0000 | -0.0000 | -1.4019 | -0.0000 | -0.6425 | -0.4809 | -2.4502 | 0.0000  | -1.0671 | -0.0000 | -1.4019 | -0.0000 | -1.2001 | -0.0000 | -1.4019 | -0.0000 | -1.2001 | -0.0000 | -1.4019 | -0.0000 | -1.2001 | -0.0000 | -1.4019 | -0.0000 | -1.2001 | -0.0000 |        |
| AT546530 | -0.1955 | -0.7947 | -0.7547 | 0.2562  | -0.6767 | -0.3862 | -0.4898 | -0.5788 | -0.1961 | -0.9797 | -1.1609 | -0.0009 | -0.1565 | -0.8310 | -0.0752 | -0.9693 | -1.3448 | -0.0191 | -0.7367 | -0.7505 | -0.0000 | -0.3778 | -0.9518 | -0.4140 | -0.6968 | -0.2021 | -0.0001 | 0.0000  |        |
| AT546600 | 1.6978  | 0.0134  | 0.4178  | 0.0006  | -1.4706 | 0.1474  | -0.8854 | -0.3968 | -1.4505 | 0.0840  | -0.771  | 0.3883  | -2.0798 | 0.0001  | -0.2096 | -0.0005 | -0.3526 | -0.8947 | -1.1701 | -0.2336 | -0.3007 | -0.6124 | -2.3194 | 0.0000  | -0.7260 | -0.0000 | -0.2141 | 0.7866  |        |
| AT546670 | -0.5721 | -0.0007 | -1.2128 | 0.1422  | -0.2406 | 0.0000  | -0.7079 | -0.9975 | -2.5003 | 0.0001  | -0.5021 | -0.7550 | -2.3724 | 0.0000  | -0.2713 | -0.0000 | -0.5499 | -0.4794 | -0.0868 | -0.0868 | -0.5767 | -0.0857 | -0.4895 | -0.3538 | -0.8457 | -0.0000 | -0.7226 | -0.7971 |        |
| AT546720 | -1.4622 | 0.0000  | -0.0000 | -0.0000 | -1.3802 | 0.0000  | -1.3002 | 0.0000  | -1.4664 | 0.0000  | -1.2326 | -0.0000 | -1.4664 | 0.0000  | -1.1864 | -0.1819 | -1.7880 | -0.0000 | -1.1864 | -0.1819 | -1.7880 | -0.0000 | -1.1864 | -0.1819 | -1.7880 | -0.0000 | -1.1864 | -0.1819 |        |
| AT546730 | -0.0000 | 0.0000  | 1.0000  | 0.0000  | 0.0000  | 0.0000  |         |         |         |         |         |         |         |         |         |         |         |         |         |         |         |         |         |         |         |         |         |         |        |

|          |         |        |         |        |         |        |         |         |         |         |         |         |         |         |         |         |         |         |         |         |         |        |         |        |         |         |         |         |         |        |
|----------|---------|--------|---------|--------|---------|--------|---------|---------|---------|---------|---------|---------|---------|---------|---------|---------|---------|---------|---------|---------|---------|--------|---------|--------|---------|---------|---------|---------|---------|--------|
| AT507630 | 0.1660  | 0.8130 | -0.5865 | 0.2017 | -0.4895 | 0.5886 | 0.2202  | 0.3003  | 0.7363  | -0.9479 | 0.6148  | -1.1705 | 0.0063  | 0.0063  | 0.9098  | -0.3424 | 0.6688  | -1.0445 | 0.0088  | -0.7643 | 0.1426  | 0.2320 | 0.9064  | 0.1077 | 0.8513  | 0.0928  | 0.9254  | -2.1463 | 0.0000  |        |
| AT507630 | 0.5627  | 0.4890 | 1.6356  | 0.0225 | 1.5239  | 0.0959 | 1.0556  | 0.2826  | 0.9339  | 0.8882  | 1.2298  | 0.0114  | -0.1408 | -0.7270 | 0.3462  | 1.0158  | 0.3221  | 1.1895  | 0.1099  | 1.0449  | 0.3270  | 0.4822 | 0.1000  | 0.2321 | 0.8232  | 1.3398  | 0.2117  | 2.2925  | 0.0000  |        |
| AT507630 | 0.0014  | 0.0014 | 0.0014  | 0.0014 | 0.0014  | 0.0014 | 0.0014  | 0.0014  | 0.0014  | 0.0014  | 0.0014  | 0.0014  | 0.0014  | 0.0014  | 0.0014  | 0.0014  | 0.0014  | 0.0014  | 0.0014  | 0.0014  | 0.0014  | 0.0014 | 0.0014  | 0.0014 | 0.0014  | 0.0014  | 0.0014  | 0.0014  | 0.0014  |        |
| AT507630 | -2.7884 | 0.0000 | -2.7771 | 0.0000 | -0.7490 | 0.9316 | -0.8558 | -0.8113 | -1.5126 | 0.0000  | -0.6132 | 0.3408  | -2.2517 | 0.0000  | -1.3326 | 0.0000  | -1.5518 | 0.0000  | -1.7907 | 0.0000  | -1.4004 | 0.0000 | -0.9280 | 0.0000 | -2.2812 | 0.0000  | -1.2852 | 0.0000  | -0.6157 | 0.1553 |
| AT507630 | -2.0597 | 0.0001 | -1.0640 | 0.8613 | 0.0353  | 0.9759 | 0.5105  | 0.5354  | -0.0277 | 0.5211  | 0.0478  | 0.9563  | -2.7157 | 0.0000  | -1.0659 | 0.1374  | -0.2018 | 0.7768  | -0.2642 | 0.6974  | -0.3044 | 0.0514 | -2.3611 | 0.0000 | 0.4516  | 0.6502  | 0.4035  | 0.5768  | 0.0000  |        |
| AT507630 | -2.5987 | 0.0001 | -1.5437 | 0.0412 | 1.9196  | 0.0322 | 0.0200  | 0.9885  | -1.8629 | 0.0209  | -0.7824 | 0.5348  | -2.2984 | 0.0005  | -1.8793 | 0.0173  | -1.0841 | 0.0320  | -0.4271 | 0.7798  | -1.7752 | 0.0447 | -2.6818 | 0.0003 | -2.0450 | 0.0073  | -0.8476 | 0.1698  | 0.2392  | 0.0000 |
| AT507630 | -2.1154 | 0.0001 | -0.9681 | 0.0012 | 0.7750  | 0.1718 | -0.1502 | 0.0654  | -0.4667 | 0.4878  | -1.3073 | 0.0076  | 0.2142  | -0.0462 | -0.9462 | 0.0000  | -1.1984 | 0.3504  | -1.1078 | 0.0000  | -0.9665 | 0.0000 | -0.9665 | 0.0000 | -0.9665 | 0.0000  | -0.9665 | 0.0000  | -0.9665 | 0.0000 |
| AT507630 | -1.6934 | 0.0122 | -0.0405 | 0.1792 | -0.4371 | 0.6746 | -1.3795 | 0.1242  | 0.3275  | 0.8164  | -1.5704 | 0.0046  | -2.0846 | 0.0000  | -0.2927 | 0.8698  | -1.5597 | 0.0276  | -1.9887 | 0.0118  | -1.8793 | 0.0185 | -1.5104 | 0.0285 | -0.1877 | 0.9085  | -1.0684 | 0.7062  | 0.1061  | 0.0000 |
| AT507630 | -2.0007 | 0.0000 | -0.8444 | 0.0167 | 1.2111  | 0.0158 | -0.7001 | 0.2860  | 0.1134  | 0.3203  | 0.2807  | 0.6412  | -2.4629 | 0.0000  | 0.9004  | 0.1118  | -0.1207 | 0.8467  | -1.0300 | 0.0000  | -0.9004 | 0.0000 | -0.9004 | 0.0000 | -0.9004 | 0.0000  | -0.9004 | 0.0000  | -0.9004 | 0.0000 |
| AT507630 | -0.1376 | 0.0132 | -0.7420 | 0.0033 | 1.2961  | 0.0412 | -1.4386 | 0.0200  | -1.7162 | 0.0277  | -1.5491 | 0.0009  | -1.5613 | 0.0005  | -2.3204 | 0.0000  | -2.2732 | 0.0000  | -1.1930 | 0.0003  | -0.1338 | 0.7477 | -2.1386 | 0.0000 | -2.3748 | 0.0000  | -2.3847 | 0.0000  | -2.3847 | 0.0000 |
| AT507630 | -0.0119 | 0.0001 | -0.0001 | 0.0001 | 0.0001  | 0.0001 | 0.0001  | 0.0001  | 0.0001  | 0.0001  | 0.0001  | 0.0001  | 0.0001  | 0.0001  | 0.0001  | 0.0001  | 0.0001  | 0.0001  | 0.0001  | 0.0001  | 0.0001  | 0.0001 | 0.0001  | 0.0001 | 0.0001  | 0.0001  | 0.0001  | 0.0001  | 0.0001  | 0.0001 |
| AT507630 | -0.5856 | 0.4830 | -1.0093 | 0.2084 | 0.0033  | 0.8414 | -0.1247 | 0.7254  | -0.0347 | 0.9845  | -1.7997 | 0.0173  | 1.0447  | 0.1299  | 0.0758  | 0.9752  | -1.7694 | 0.0113  | -0.8959 | 0.5710  | 0.8888  | 0.3335 | -0.4345 | 0.8888 | 0.3335  | -0.4345 | 0.8888  | 0.3335  | -0.4345 | 0.8888 |
| AT507630 | -2.1751 | 0.0000 | -0.9374 | 0.0047 | 0.8140  | 0.0239 | -0.4809 | 0.0338  | -1.1661 | 0.0004  | -0.7185 | 0.0496  | -2.3487 | 0.0000  | -1.7601 | 0.0000  | -0.8541 | 0.0102  | -1.7100 | 0.0063  | -1.3275 | 0.0001 | -1.9004 | 0.0000 | -1.2820 | 0.0001  | -0.7247 | 0.0203  | 0.0000  | 0.0000 |
| AT507630 | -0.5866 | 0.4830 | -1.0093 | 0.2084 | 0.0033  | 0.8414 | -0.1247 | 0.7254  | -0.0347 | 0.9845  | -1.7997 | 0.0173  | 1.0447  | 0.1299  | 0.0758  | 0.9752  | -1.7694 | 0.0113  | -0.8959 | 0.5710  | 0.8888  | 0.3335 | -0.4345 | 0.8888 | 0.3335  | -0.4345 | 0.8888  | 0.3335  | -0.4345 | 0.8888 |
| AT507630 | -0.5866 | 0.4830 | -1.0093 | 0.2084 | 0.0033  | 0.8414 | -0.1247 | 0.7254  | -0.0347 | 0.9845  | -1.7997 | 0.0173  | 1.0447  | 0.1299  | 0.0758  | 0.9752  | -1.7694 | 0.0113  | -0.8959 | 0.5710  | 0.8888  | 0.3335 | -0.4345 | 0.8888 | 0.3335  | -0.4345 | 0.8888  | 0.3335  | -0.4345 | 0.8888 |
| AT507630 | -0.5866 | 0.4830 | -1.0093 | 0.2084 | 0.0033  | 0.8414 | -0.1247 | 0.7254  | -0.0347 | 0.9845  | -1.7997 | 0.0173  | 1.0447  | 0.1299  | 0.0758  | 0.9752  | -1.7694 | 0.0113  | -0.8959 | 0.5710  | 0.8888  | 0.3335 | -0.4345 | 0.8888 | 0.3335  | -0.4345 | 0.8888  | 0.3335  | -0.4345 | 0.8888 |
| AT507630 | -0.5866 | 0.4830 | -1.0093 | 0.2084 | 0.0033  | 0.8414 | -0.1247 | 0.7254  | -0.0347 | 0.9845  | -1.7997 | 0.0173  | 1.0447  | 0.1299  | 0.0758  | 0.9752  | -1.7694 | 0.0113  | -0.8959 | 0.5710  | 0.8888  | 0.3335 | -0.4345 | 0.8888 | 0.3335  | -0.4345 | 0.8888  | 0.3335  | -0.4345 | 0.8888 |
| AT507630 | -0.5866 | 0.4830 | -1.0093 | 0.2084 | 0.0033  | 0.8414 | -0.1247 | 0.7254  | -0.0347 | 0.9845  | -1.7997 | 0.0173  | 1.0447  | 0.1299  | 0.0758  | 0.9752  | -1.7694 | 0.0113  | -0.8959 | 0.5710  | 0.8888  | 0.3335 | -0.4345 | 0.8888 | 0.3335  | -0.4345 | 0.8888  | 0.3335  | -0.4345 | 0.8888 |
| AT507630 | -0.5866 | 0.4830 | -1.0093 | 0.2084 | 0.0033  | 0.8414 | -0.1247 | 0.7254  | -0.0347 | 0.9845  | -1.7997 | 0.0173  | 1.0447  | 0.1299  | 0.0758  | 0.9752  | -1.7694 | 0.0113  | -0.8959 | 0.5710  | 0.8888  | 0.3335 | -0.4345 | 0.8888 | 0.3335  | -0.4345 | 0.8888  | 0.3335  | -0.4345 | 0.8888 |
| AT507630 | -0.5866 | 0.4830 | -1.0093 | 0.2084 | 0.0033  | 0.8414 | -0.1247 | 0.7254  | -0.0347 | 0.9845  | -1.7997 | 0.0173  | 1.0447  | 0.1299  | 0.0758  | 0.9752  | -1.7694 | 0.0113  | -0.8959 | 0.5710  | 0.8888  | 0.3335 | -0.4345 | 0.8888 | 0.3335  | -0.4345 | 0.8888  | 0.3335  | -0.4345 | 0.8888 |
| AT507630 | -0.5866 | 0.4830 | -1.0093 | 0.2084 | 0.0033  | 0.8414 | -0.1247 | 0.7254  | -0.0347 | 0.9845  | -1.7997 | 0.0173  | 1.0447  | 0.1299  | 0.0758  | 0.9752  | -1.7694 | 0.0113  | -0.8959 | 0.5710  | 0.8888  | 0.3335 | -0.4345 | 0.8888 | 0.3335  | -0.4345 | 0.8888  | 0.3335  | -0.4345 | 0.8888 |
| AT507630 | -0.5866 | 0.4830 | -1.0093 | 0.2084 | 0.0033  | 0.8414 | -0.1247 | 0.7254  | -0.0347 | 0.9845  | -1.7997 | 0.0173  | 1.0447  | 0.1299  | 0.0758  | 0.9752  | -1.7694 | 0.0113  | -0.8959 | 0.5710  | 0.8888  | 0.3335 | -0.4345 | 0.8888 | 0.3335  | -0.4345 | 0.8888  | 0.3335  | -0.4345 | 0.8888 |
| AT507630 | -0.5866 | 0.4830 | -1.0093 | 0.2084 | 0.0033  | 0.8414 | -0.1247 | 0.7254  | -0.0347 | 0.9845  | -1.7997 | 0.0173  | 1.0447  | 0.1299  | 0.0758  | 0.9752  | -1.7694 | 0.0113  | -0.8959 | 0.5710  | 0.8888  | 0.3335 | -0.4345 | 0.8888 | 0.3335  | -0.4345 | 0.8888  | 0.3335  | -0.4345 | 0.8888 |
| AT507630 | -0.5866 | 0.4830 | -1.0093 | 0.2084 | 0.0033  | 0.8414 | -0.1247 | 0.7254  | -0.0347 | 0.9845  | -1.7997 | 0.0173  | 1.0447  | 0.1299  | 0.0758  | 0.9752  | -1.7694 | 0.0113  | -0.8959 | 0.5710  | 0.8888  | 0.3335 | -0.4345 | 0.8888 | 0.3335  | -0.4345 | 0.8888  | 0.3335  | -0.4345 | 0.8888 |
| AT507630 | -0.5866 | 0.4830 | -1.0093 | 0.2084 | 0.0033  | 0.8414 | -0.1247 | 0.7254  | -0.0347 | 0.9845  | -1.7997 | 0.0173  | 1.0447  | 0.1299  | 0.0758  | 0.9752  | -1.7694 | 0.0113  | -0.8959 | 0.5710  | 0.8888  | 0.3335 | -0.4345 | 0.8888 | 0.3335  | -0.4345 | 0.8888  | 0.3335  | -0.4345 | 0.8888 |
| AT507630 | -0.5866 | 0.4830 | -1.0093 | 0.2084 | 0.0033  | 0.8414 | -0.1247 | 0.7254  | -0.0347 | 0.9845  | -1.7997 | 0.0173  | 1.0447  | 0.1299  | 0.0758  | 0.9752  | -1.7694 | 0.0113  | -0.8959 | 0.5710  | 0.8888  | 0.3335 | -0.4345 | 0.8888 | 0.3335  | -0.4345 | 0.8888  | 0.3335  | -0.4345 | 0.8888 |
| AT507630 | -0.5866 | 0.4830 | -1.0093 | 0.2084 | 0.0033  | 0.8414 | -0.1247 | 0.7254  | -0.0347 | 0.9845  | -1.7997 | 0.0173  | 1.0447  | 0.1299  | 0.0758  | 0.9752  | -1.7694 | 0.0113  | -0.8959 | 0.5710  | 0.8888  | 0.3335 | -0.4345 | 0.8888 | 0.3335  | -0.4345 | 0.8888  | 0.3335  | -0.4345 | 0.8888 |
| AT507630 | -0.5866 | 0.4830 | -1.0093 | 0.2084 | 0.0033  | 0.8414 | -0.1247 | 0.7254  | -0.0347 | 0.9845  | -1.7997 | 0.0173  | 1.0447  | 0.1299  | 0.0758  | 0.9752  | -1.7694 | 0.0113  | -0.8959 | 0.5710  | 0.8888  | 0.3335 | -0.4345 | 0.8888 | 0.3335  | -0.4345 | 0.8888  | 0.3335  | -0.4345 | 0.8888 |
| AT507630 | -0.5866 | 0.4830 | -1.0093 | 0.2084 | 0.0033  | 0.8414 | -0.1247 | 0.7254  | -0.0347 | 0.9845  | -1.7997 | 0.0173  | 1.0447  | 0.1299  | 0.0758  | 0.9752  | -1.7694 | 0.0113  | -0.8959 | 0.5710  | 0.8888  | 0.3335 | -0.4345 | 0.8888 | 0.3335  | -0.4345 | 0.8888  | 0.3335  | -0.4345 | 0.8888 |
| AT507630 | -0.5866 | 0.4830 | -1.0093 | 0.2084 | 0.0033  | 0.8414 | -0.1247 | 0.7254  | -0.0347 | 0.9845  | -1.7997 | 0.0173  | 1.0447  | 0.1299  | 0.0758  | 0.9752  | -1.7694 | 0.0113  | -0.8959 | 0.5710  | 0.8888  | 0.3335 | -0.4345 | 0.8888 | 0.3335  | -0.4345 | 0.8888  | 0.3335  | -0.4345 | 0.8888 |
| AT507630 | -0.5866 | 0.4830 | -1.0093 | 0.2084 | 0.0033  | 0.8414 | -0.1247 | 0.7254  | -0.0347 | 0.9845  | -1.7997 | 0.0173  | 1.0447  | 0.1299  | 0.0758  | 0.9752  | -1.7694 | 0.0113  | -0.8959 | 0.5710  | 0.8888  | 0.3335 | -0.4345 | 0.8888 | 0.3335  | -0.4345 | 0.8888  | 0.3335  | -0.4345 | 0.8888 |
| AT507630 | -0.5866 | 0.4830 | -1.0093 | 0.2084 | 0.0033  | 0.8414 | -0.1247 | 0.7254  | -0.0347 | 0.9845  | -1.7997 | 0.0173  | 1.0447  | 0.1299  | 0.0758  | 0.9752  | -1.7694 | 0.0113  | -0.8959 | 0.5710  | 0.8888  | 0.3335 | -0.4345 | 0.8888 | 0.3335  | -0.4345 | 0.8888  | 0.3335  | -0.4345 | 0.8888 |
| AT507630 | -0.5866 | 0.4830 | -1.0093 | 0.2084 | 0.0033  | 0.8414 | -0.1247 | 0.7254  | -0.0347 | 0.9845  | -1.7997 | 0.0173  | 1.0447  | 0.1299  | 0.0758  | 0.9752  | -1.7694 | 0.0113  | -0.8959 | 0.5710  | 0.8888  | 0.3335 | -0.4345 | 0.8888 | 0.3335  | -0.4345 | 0.8888  | 0.3335  | -0.4345 | 0.8888 |
| AT507630 | -0.5866 | 0.4830 | -1.0093 | 0.2084 | 0.0033  | 0.8414 | -0.1247 | 0.7254  | -0.0347 | 0.9845  | -1.7997 | 0.0173  | 1.0447  | 0.1299  | 0.0758  | 0.9752  | -1.7694 | 0.0113  | -0.8959 | 0.5710  | 0.8888  | 0.3335 | -0.4345 | 0.8888 | 0.3335  | -0.4345 | 0.8888  | 0.3335  | -0.4345 | 0.8888 |
| AT507630 | -0.5866 | 0.4830 | -1.0093 | 0.2084 | 0.0033  | 0.8414 | -0.1247 | 0.7254  | -0.0347 | 0.9845  | -1.7997 | 0.0173  | 1.0447  | 0.1299  | 0.0758  | 0.9752  | -1.7694 | 0.0113  | -0.8959 | 0.5710  | 0.8888  | 0.3335 | -0.4345 | 0.8888 | 0.3335  | -0.4345 | 0.8888  | 0.3335  | -0.4345 | 0.8888 |
| AT507630 | -0.5866 | 0.4830 | -1.0093 | 0.2084 | 0.0033  | 0.8414 | -0.1247 | 0.7254  | -0.0347 | 0.9845  | -1.7997 | 0.0173  | 1.0447  | 0.1299  | 0.0758  | 0.9752  | -1.7694 | 0.0113  | -0.8959 | 0.5710  | 0.8888  | 0.3335 |         |        |         |         |         |         |         |        |



|           |         |        |         |        |         |        |         |        |         |        |         |        |         |        |         |        |         |        |         |        |         |        |         |        |         |        |         |        |
|-----------|---------|--------|---------|--------|---------|--------|---------|--------|---------|--------|---------|--------|---------|--------|---------|--------|---------|--------|---------|--------|---------|--------|---------|--------|---------|--------|---------|--------|
| ATCG01180 | -1.9354 | 0.0082 | -0.4589 | 0.6488 | -0.3327 | 0.7867 | -1.0702 | 0.3192 | 2.9634  | 0.0000 | -0.4087 | 0.6738 | -2.0967 | 0.0027 | -0.3556 | 0.8568 | -0.5147 | 0.5587 | -0.7744 | 0.5553 | -0.9612 | 0.3661 | -1.8106 | 0.0150 | -0.5053 | 0.7249 | -0.6798 | 0.3605 |
| ATCG01210 | -1.3651 | 0.0776 | -0.3322 | 0.7673 | -0.4283 | 0.7720 | -0.6477 | 0.5916 | 3.4251  | 0.0000 | -0.3808 | 0.7026 | -1.5160 | 0.0391 | 0.0738  | 0.9792 | -0.2332 | 0.8128 | -0.3842 | 0.8244 | -0.5568 | 0.6579 | -1.2701 | 0.1101 | -0.3206 | 0.8474 | 0.1949  | 0.8160 |
| ATMG00020 | -1.8789 | 0.0029 | -1.0150 | 0.1878 | -0.7625 | 0.4165 | -0.9812 | 0.3920 | -1.0109 | 0.2703 | -0.8147 | 0.3016 | -2.2830 | 0.0002 | -1.1219 | 0.2162 | -0.0209 | 0.9793 | -0.7232 | 0.5244 | -0.6553 | 0.5234 | -1.6554 | 0.0191 | -0.8276 | 0.4075 | 0.3262  | 0.7785 |
| ATMG00070 | -1.7010 | 0.0014 | -1.5065 | 0.0073 | -1.3859 | 0.0258 | -1.6062 | 0.0149 | -1.9486 | 0.0006 | -1.0437 | 0.0919 | -2.0557 | 0.0000 | -1.3286 | 0.0331 | -0.6701 | 0.3555 | -0.9408 | 0.2077 | -0.9729 | 0.1744 | -1.5572 | 0.0036 | -1.4275 | 0.0193 | -0.9909 | 0.4807 |
| ATMG00080 | -2.1640 | 0.0001 | -1.8692 | 0.0144 | -1.6513 | 0.0100 | -2.0201 | 0.0027 | -1.5662 | 0.0137 | -1.1646 | 0.0737 | -2.2688 | 0.0000 | -1.5303 | 0.0175 | -0.6305 | 0.3226 | -1.1582 | 0.1216 | -0.7486 | 0.3612 | -1.9456 | 0.0005 | -1.1139 | 0.1159 | -0.7862 | 0.1617 |
| ATMG00090 | -1.7200 | 0.0086 | -1.6848 | 0.0145 | -1.4261 | 0.0710 | -1.1212 | 0.2215 | -1.1935 | 0.1595 | -1.0023 | 0.1906 | -2.2956 | 0.0002 | -1.4925 | 0.0576 | -0.6029 | 0.4214 | -0.9780 | 0.3193 | -0.1492 | 0.9179 | -1.6344 | 0.0138 | -1.2451 | 0.1271 | -0.3420 | 0.6244 |
| ATMG00090 | -1.6171 | 0.0122 | -0.7550 | 0.3847 | -1.2307 | 0.1802 | -0.2108 | 0.8780 | -0.1201 | 0.9493 | 0.0187  | 0.9881 | -2.1780 | 0.0011 | -0.0579 | 0.9830 | -0.8842 | 0.5274 | 1.2322  | 0.1446 | 0.3609  | 0.7775 | -1.7911 | 0.0177 | -0.4399 | 0.7558 | -0.3076 | 0.6884 |
| ATMG01190 | -2.3506 | 0.0002 | -1.2122 | 0.0969 | -1.3070 | 0.1046 | -1.6178 | 0.0532 | -1.0558 | 0.2354 | -1.0861 | 0.1512 | -2.6500 | 0.0000 | -1.3153 | 0.1143 | -0.4143 | 0.6034 | -1.1718 | 0.1965 | -0.8832 | 0.3486 | -2.0776 | 0.0011 | -1.2396 | 0.1271 | -0.9083 | 0.1557 |
