# Supplementary material for: Unrelated Fungal Rust Candidate Effectors Act on Overlapping Plant Functions
Source: MDPI journal article supplement (doi:10.3390/microorganisms9050996), 2021-05-05
Supplement: s1 [file s1]

**Supplementary Table S6.** Sequencing results and alignment summary.

| Sample name | Number of Reads | Average Quality | Mate inner distance | % Duplicate | Surviving  | Aligned    | %Aligned |
|-------------|-----------------|-----------------|---------------------|-------------|------------|------------|----------|
| CNT-1       | 12,959,539      | 37              | 50                  | 39.57       | 11,420,407 | 6,578,769  | 58       |
| CNT-2       | 17,628,091      | 39              | 60                  | 24.15       | 16,441,057 | 15,326,908 | 93       |
| CNT-3       | 44,449,775      | 39              | 84                  | 32.81       | 40,740,349 | 38,447,039 | 94       |
| 102036-1    | 14,725,402      | 38              | 115                 | 21.91       | 13,749,600 | 12,482,030 | 91       |
| 102036-2    | 16,097,041      | 38              | 110                 | 24.53       | 14,863,654 | 13,794,120 | 93       |
| 102036-3    | 18,644,518      | 38              | 110                 | 19.00       | 17,175,540 | 14,121,101 | 82       |
| 106078-1    | 14,806,842      | 38              | 70                  | 27.15       | 13,707,505 | 12,657,991 | 92       |
| 106078-2    | 16,097,885      | 38              | 70                  | 23.93       | 14,896,296 | 13,620,408 | 91       |
| 106078-3    | 57,392,974      | 39              | 55                  | 35.94       | 52,226,039 | 49,146,796 | 94       |
| 123218-1    | 14,941,915      | 38              | 60                  | 20.13       | 13,911,559 | 12,766,811 | 92       |
| 123218-2    | 19,202,251      | 38              | 60                  | 24.98       | 17,740,615 | 16,007,510 | 90       |
| 123218-3    | 14,573,522      | 38              | 65                  | 27.47       | 13,336,684 | 10,353,032 | 78       |
| 123227-1    | 14,506,123      | 38              | 60                  | 23.68       | 13,559,794 | 12,650,378 | 93       |
| 123227-2    | 13,690,077      | 38              | 70                  | 21.88       | 12,740,323 | 11,674,516 | 92       |
| 123227-3    | 14,221,348      | 38              | 65                  | 25.24       | 13,044,995 | 10,662,871 | 82       |
| 123531-1    | 30,255,033      | 39              | 70                  | 53.11       | 28,677,354 | 26,311,924 | 92       |
| 123531-2    | 29,847,359      | 39              | 60                  | 46.49       | 28,400,730 | 26,243,184 | 92       |
| 123531-3    | 33,185,737      | 39              | 65                  | 30.72       | 31,504,015 | 29,142,533 | 93       |
| 124256-1    | 13,219,309      | 38              | 110                 | 22.30       | 12,270,185 | 11,319,954 | 92       |
| 124256-2    | 15,023,134      | 38              | 60                  | 23.12       | 13,721,513 | 11,218,900 | 82       |
| 124256-3    | 53,119,639      | 39              | 60                  | 38.35       | 48,711,081 | 45,705,676 | 94       |
| 124266-1    | 14,512,508      | 37              | 60                  | 21.17       | 13,288,961 | 12,184,913 | 92       |
| 124266-2    | 14,343,047      | 37              | 100                 | 23.84       | 13,084,917 | 11,752,213 | 90       |
| 124266-3    | 16,738,628      | 37              | 70                  | 21.41       | 15,203,780 | 13,696,801 | 90       |
| 124357-1    | 17,594,958      | 38              | 80                  | 22.41       | 16,313,595 | 15,140,354 | 93       |
| 124357-2    | 15,759,938      | 38              | 115                 | 21.54       | 14,538,561 | 13,287,744 | 91       |
| 124357-3    | 17,205,907      | 38              | 105                 | 19.78       | 15,823,808 | 13,959,229 | 88       |
| 124466-1    | 15,994,909      | 38              | 150                 | 21.84       | 14,896,010 | 13,790,242 | 93       |
| 124466-2    | 17,877,587      | 38              | 105                 | 20.43       | 16,470,499 | 14,898,728 | 90       |
| 124466-3    | 12,451,485      | 39              | 70                  | 19.33       | 11,616,591 | 10,726,259 | 92       |
| 124497-1    | 15,410,965      | 39              | 70                  | 21.36       | 14,559,104 | 13,634,149 | 94       |
| 124497-2    | 25,299,826      | 39              | 60                  | 29.76       | 23,916,582 | 22,416,808 | 94       |
| 124497-3    | 14,250,049      | 39              | 70                  | 24.61       | 12,724,994 | 11,533,107 | 91       |
| 124499-1    | 12,422,097      | 38              | 60                  | 22.33       | 11,615,353 | 10,818,003 | 93       |
| 124499-2    | 14,079,283      | 38              | 60                  | 21.04       | 13,059,459 | 11,939,187 | 91       |
| 124499-3    | 16,445,351      | 38              | 100                 | 27.87       | 14,910,023 | 13,122,045 | 88       |
| 124518-1    | 14,485,964      | 36              | 110                 | 23.32       | 13,094,223 | 11,731,759 | 90       |
| 124518-2    | 12,911,956      | 36              | 105                 | 23.39       | 11,553,534 | 9,944,892  | 86       |
| 124518-3    | 11,347,886      | 34              | 45                  | 21.35       | 9,346,542  | 8,246,506  | 88       |
| 37347-1     | 27,784,075      | 39              | 70                  | 28.79       | 26,345,883 | 25,136,138 | 95       |
| 37347-2     | 23,439,580      | 38              | 65                  | 31.35       | 21,914,868 | 20,722,973 | 95       |
| 37347-3     | 14,033,172      | 39              | 65                  | 23.16       | 13,268,922 | 12,674,770 | 96       |
| 72983-1     | 23,393,778      | 38              | 55                  | 21.00       | 21,669,105 | 19,896,426 | 92       |
| 72983-2     | 15,230,634      | 38              | 55                  | 24.76       | 13,982,126 | 12,497,170 | 89       |
| 72983-3     | 14,014,784      | 38              | 64                  | 24.18       | 12,928,472 | 11,095,184 | 86       |
