# Supplementary material for: Unrelated Fungal Rust Candidate Effectors Act on Overlapping Plant Functions
Source: MDPI journal article supplement (doi:10.3390/microorganisms9050996), 2021-05-05
Supplement: s1 [file s1]

**Supplementary Table S4.** Metabolites assigned and deregulated in each sample separated by category. Identified metabolites are those present either in the sample or in the control. The percentages were calculated by dividing the number of formulas assigned or deregulated in the sample in each category by the number of formulas identified in that sample and multiplying by 100.

| Sample    | Compound category               | Identified (%) | Assigned | Deregulated (%) | Up (%)    | Down (%)   |
|-----------|---------------------------------|----------------|----------|-----------------|-----------|------------|
| Control   | Polyphenolic                    | 143            | -        | -               | -         | -          |
|           | Highly unsaturated and phenolic | 1712           | -        | -               | -         | -          |
|           | Peptide-like                    | 309            | -        | -               | -         | -          |
|           | Aliphatic                       | 835            | -        | -               | -         | -          |
|           | Sugar                           | 58             | -        | -               | -         | -          |
|           | Condensed aromatic              | 56             | -        | -               | -         | -          |
| Mlp37347  | Polyphenolic                    | 1947 (54.45)   | 1509     | 57 (1.59)       | 26 (0.73) | 31 (0.87)  |
|           | Highly unsaturated and phenolic | 437 (12.22)    | 402      | 20 (0.56)       | 20 (0.56) | 0 (0.00)   |
|           | Peptide-like                    | 61 (1.71)      | 47       | 2 (0.06)        | 1 (0.03)  | 1 (0.03)   |
|           | Aliphatic                       | 166 (4.64)     | 127      | 8 (0.22)        | 5 (0.14)  | 3 (0.08)   |
|           | Sugar                           | 67 (1.87)      | 47       | 1 (0.03)        | 1 (0.03)  | 0 (0.00)   |
|           | Condensed aromatic              | 898 (25.11)    | 822      | 13 (0.36)       | 5 (0.14)  | 8 (0.22)   |
| Mlp72983  | Polyphenolic                    | 1966 (54.99)   | 1655     | 63 (1.76)       | 13 (0.36) | 50 (1.40)  |
|           | Highly unsaturated and phenolic | 366 (10.24)    | 285      | 13 (0.36)       | 2 (0.06)  | 11 (0.31)  |
|           | Peptide-like                    | 62 (1.73)      | 40       | 6 (0.17)        | 0 (0.00)  | 6 (0.17)   |
|           | Aliphatic                       | 166 (4.64)     | 125      | 7 (0.20)        | 1 (0.03)  | 6 (0.17)   |
|           | Sugar                           | 80 (2.24)      | 64       | 2 (0.06)        | 0 (0.00)  | 2 (0.06)   |
|           | Condensed aromatic              | 935 (26.15)    | 887      | 9 (0.25)        | 6 (0.17)  | 3 (0.08)   |
| Mlp102036 | Polyphenolic                    | 2004 (53.89)   | 1539     | 158 (4.25)      | 68 (1.83) | 90 (2.42)  |
|           | Highly unsaturated and phenolic | 495 (13.31)    | 448      | 75 (2.02)       | 69 (1.86) | 6 (0.16)   |
|           | Peptide-like                    | 75 (2.02)      | 64       | 3 (0.08)        | 2 (0.05)  | 1 (0.03)   |
|           | Aliphatic                       | 178 (4.79)     | 145      | 14 (0.38)       | 7 (0.19)  | 7 (0.19)   |
|           | Sugar                           | 70 (1.88)      | 47       | 6 (0.16)        | 3 (0.08)  | 3 (0.08)   |
|           | Condensed aromatic              | 897 (24.12)    | 802      | 22 (0.59)       | 15 (0.40) | 7 (0.19)   |
| Mlp106078 | Polyphenolic                    | 1942 (55.14)   | 1454     | 78 (2.21)       | 25 (0.71) | 53 (1.50)  |
|           | Highly unsaturated and phenolic | 400 (11.36)    | 351      | 17 (0.48)       | 14 (0.40) | 3 (0.09)   |
|           | Peptide-like                    | 66 (1.87)      | 54       | 2 (0.06)        | 0 (0.00)  | 2 (0.06)   |
|           | Aliphatic                       | 172 (4.88)     | 128      | 9 (0.26)        | 1 (0.03)  | 8 (0.23)   |
|           | Sugar                           | 64 (1.82)      | 40       | 0 (0.00)        | 0 (0.00)  | 0 (0.00)   |
|           | Condensed aromatic              | 878 (24.93)    | 769      | 13 (0.37)       | 6 (0.17)  | 7 (0.20)   |
| Mlp123218 | Polyphenolic                    | 1895 (53.91)   | 1398     | 67 (1.91)       | 36 (1.02) | 31 (0.88)  |
|           | Highly unsaturated and phenolic | 444 (12.63)    | 379      | 53 (1.51)       | 49 (1.39) | 4 (0.11)   |
|           | Peptide-like                    | 69 (1.96)      | 53       | 3 (0.09)        | 2 (0.06)  | 1 (0.03)   |
|           | Aliphatic                       | 166 (4.72)     | 118      | 4 (0.11)        | 2 (0.06)  | 2 (0.06)   |
|           | Sugar                           | 62 (1.76)      | 32       | 2 (0.06)        | 0 (0.00)  | 2 (0.06)   |
|           | Condensed aromatic              | 879 (25.01)    | 715      | 10 (0.28)       | 8 (0.23)  | 2 (0.06)   |
| Mlp123227 | Polyphenolic                    | 1974 (54.16)   | 1320     | 214 (5.87)      | 71 (1.95) | 143 (3.92) |
|           | Highly unsaturated and phenolic | 439 (12.04)    | 378      | 59 (1.62)       | 54 (1.48) | 5 (0.14)   |
|           | Peptide-like                    | 77 (2.11)      | 59       | 12 (0.33)       | 5 (0.14)  | 7 (0.19)   |
|           | Aliphatic                       | 182 (4.99)     | 122      | 20 (0.55)       | 8 (0.22)  | 12 (0.33)  |
|           | Sugar                           | 76 (2.09)      | 46       | 8 (0.22)        | 4 (0.11)  | 4 (0.11)   |
|           | Condensed aromatic              | 897 (24.61)    | 754      | 40 (1.10)       | 30 (0.82) | 10 (0.27)  |

|           |                                 |              |      |            |           |            |
|-----------|---------------------------------|--------------|------|------------|-----------|------------|
| Mlp123531 | Polyphenolic                    | 1951 (54.21) | 1610 | 59 (1.64)  | 28 (0.78) | 31 (0.86)  |
|           | Highly unsaturated and phenolic | 449 (12.48)  | 422  | 28 (0.78)  | 27 (0.75) | 1 (0.03)   |
|           | Peptide-like                    | 68 (1.89)    | 57   | 2 (0.06)   | 1 (0.03)  | 1 (0.03)   |
|           | Aliphatic                       | 162 (4.50)   | 125  | 6 (0.17)   | 2 (0.06)  | 4 (0.11)   |
|           | Sugar                           | 68 (1.89)    | 44   | 4 (0.11)   | 1 (0.03)  | 3 (0.08)   |
|           | Condensed aromatic              | 901 (25.03)  | 815  | 14 (0.39)  | 11 (0.31) | 3 (0.08)   |
| Mlp124256 | Polyphenolic                    | 1916 (55.22) | 1495 | 49 (1.41)  | 14 (0.40) | 35 (1.01)  |
|           | Highly unsaturated and phenolic | 340 (9.80)   | 248  | 10 (0.29)  | 3 (0.09)  | 7 (0.20)   |
|           | Peptide-like                    | 68 (1.96)    | 57   | 4 (0.12)   | 3 (0.09)  | 1 (0.03)   |
|           | Aliphatic                       | 171 (4.93)   | 134  | 1 (0.03)   | 0 (0.00)  | 1 (0.03)   |
|           | Sugar                           | 77 (2.22)    | 52   | 4 (0.12)   | 2 (0.06)  | 2 (0.06)   |
|           | Condensed aromatic              | 898 (25.88)  | 829  | 9 (0.26)   | 3 (0.09)  | 6 (0.17)   |
| Mlp124266 | Polyphenolic                    | 1936 (53.85) | 1340 | 153 (4.26) | 34 (0.95) | 119 (3.31) |
|           | Highly unsaturated and phenolic | 438 (12.18)  | 395  | 32 (0.89)  | 26 (0.72) | 6 (0.17)   |
|           | Peptide-like                    | 74 (2.06)    | 58   | 9 (0.25)   | 4 (0.11)  | 5 (0.14)   |
|           | Aliphatic                       | 168 (4.67)   | 122  | 14 (0.39)  | 5 (0.14)  | 9 (0.25)   |
|           | Sugar                           | 71 (1.97)    | 41   | 8 (0.22)   | 5 (0.14)  | 3 (0.08)   |
|           | Condensed aromatic              | 908 (25.26)  | 798  | 28 (0.78)  | 16 (0.45) | 12 (0.33)  |
| Mlp124357 | Polyphenolic                    | 1983 (53.75) | 1599 | 94 (2.55)  | 27 (0.73) | 67 (1.82)  |
|           | Highly unsaturated and phenolic | 459 (12.44)  | 428  | 24 (0.65)  | 23 (0.62) | 1 (0.03)   |
|           | Peptide-like                    | 67 (1.82)    | 53   | 6 (0.16)   | 2 (0.05)  | 4 (0.11)   |
|           | Aliphatic                       | 169 (4.58)   | 131  | 9 (0.24)   | 4 (0.11)  | 5 (0.14)   |
|           | Sugar                           | 71 (1.92)    | 48   | 2 (0.05)   | 0 (0.00)  | 2 (0.05)   |
|           | Condensed aromatic              | 940 (25.48)  | 892  | 13 (0.35)  | 8 (0.22)  | 5 (0.14)   |
| Mlp124466 | Polyphenolic                    | 1920 (54.39) | 1587 | 50 (1.42)  | 14 (0.40) | 36 (1.02)  |
|           | Highly unsaturated and phenolic | 402 (11.39)  | 361  | 5 (0.14)   | 3 (0.08)  | 2 (0.06)   |
|           | Peptide-like                    | 62 (1.76)    | 50   | 0 (0.00)   | 0 (0.00)  | 0 (0.00)   |
|           | Aliphatic                       | 164 (4.65)   | 122  | 4 (0.11)   | 1 (0.03)  | 3 (0.08)   |
|           | Sugar                           | 66 (1.87)    | 43   | 0 (0.00)   | 0 (0.00)  | 0 (0.00)   |
|           | Condensed aromatic              | 916 (25.95)  | 863  | 10 (0.28)  | 6 (0.17)  | 4 (0.11)   |
| Mlp124497 | Polyphenolic                    | 1951 (54.18) | 1464 | 99 (2.75)  | 30 (0.83) | 69 (1.92)  |
|           | Highly unsaturated and phenolic | 448 (12.44)  | 418  | 44 (1.22)  | 44 (1.22) | 0 (0.00)   |
|           | Peptide-like                    | 64 (1.78)    | 52   | 3 (0.08)   | 0 (0.00)  | 3 (0.08)   |
|           | Aliphatic                       | 162 (4.50)   | 122  | 6 (0.17)   | 0 (0.00)  | 6 (0.17)   |
|           | Sugar                           | 67 (1.86)    | 37   | 3 (0.08)   | 0 (0.00)  | 3 (0.08)   |
|           | Condensed aromatic              | 909 (25.24)  | 844  | 16 (0.44)  | 8 (0.22)  | 8 (0.22)   |
| Mlp124499 | Polyphenolic                    | 1960 (54.25) | 1493 | 134 (3.71) | 48 (1.33) | 86 (2.38)  |
|           | Highly unsaturated and phenolic | 423 (11.71)  | 375  | 48 (1.33)  | 47 (1.30) | 1 (0.03)   |
|           | Peptide-like                    | 71 (1.97)    | 63   | 2 (0.06)   | 1 (0.03)  | 1 (0.03)   |
|           | Aliphatic                       | 185 (5.12)   | 150  | 12 (0.33)  | 5 (0.14)  | 7 (0.19)   |
|           | Sugar                           | 65 (1.80)    | 38   | 2 (0.06)   | 1 (0.03)  | 1 (0.03)   |
|           | Condensed aromatic              | 909 (25.16)  | 827  | 19 (0.53)  | 16 (0.44) | 3 (0.08)   |
| Mlp124518 | Polyphenolic                    | 1913 (53.93) | 1345 | 145 (4.09) | 47 (1.33) | 98 (2.76)  |
|           | Highly unsaturated and phenolic | 438 (12.35)  | 400  | 54 (1.52)  | 53 (1.49) | 1 (0.03)   |
|           | Peptide-like                    | 72 (2.03)    | 61   | 4 (0.11)   | 3 (0.08)  | 1 (0.03)   |
|           | Aliphatic                       | 171 (4.82)   | 122  | 11 (0.31)  | 5 (0.14)  | 6 (0.17)   |
|           | Sugar                           | 68 (1.92)    | 40   | 5 (0.14)   | 2 (0.06)  | 3 (0.08)   |
|           | Condensed aromatic              | 885 (24.95)  | 767  | 18 (0.51)  | 7 (0.20)  | 11 (0.31)  |
